# Supplementary material
Source: publisher figshare collection journal article supplement (https://acs.figshare.com/ndownloader/files/12269087)

# Palladium-Catalyzed Regioselective Olefination of *O*-Acetyl Cyanohydrins

Qiu-Ju Liang,<sup>a</sup> Bing Jiang,<sup>a</sup> Yun-He Xu<sup>a\*</sup> and Teck-Peng Loh<sup>a,b\*</sup>

<sup>a</sup> Department of Chemistry, University of Sciences and Technology of China, Hefei, Anhui, 230026 (China).

<sup>b</sup> Division of Chemistry and Biological Chemistry, School of Physical and Mathematical Sciences, Nanyang Technological University, Singapore, 637371 (Singapore)

E-mail: [xyh0709@ustc.edu.cn](mailto:xyh0709@ustc.edu.cn); [teckpeng@ntu.edu.sg](mailto:teckpeng@ntu.edu.sg)

## Table of Contents

|                                                                       |        |
|-----------------------------------------------------------------------|--------|
| 1. Copies of <sup>1</sup> H NMR and <sup>13</sup> C NMR spectra ..... | S2-S35 |
| 2. 1D NOE of <i>ortho</i> -olefination product of 1n.....             | S36    |

# 1. Copies of $^1\text{H}$ NMR and $^{13}\text{C}$ NMR spectra

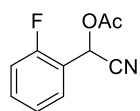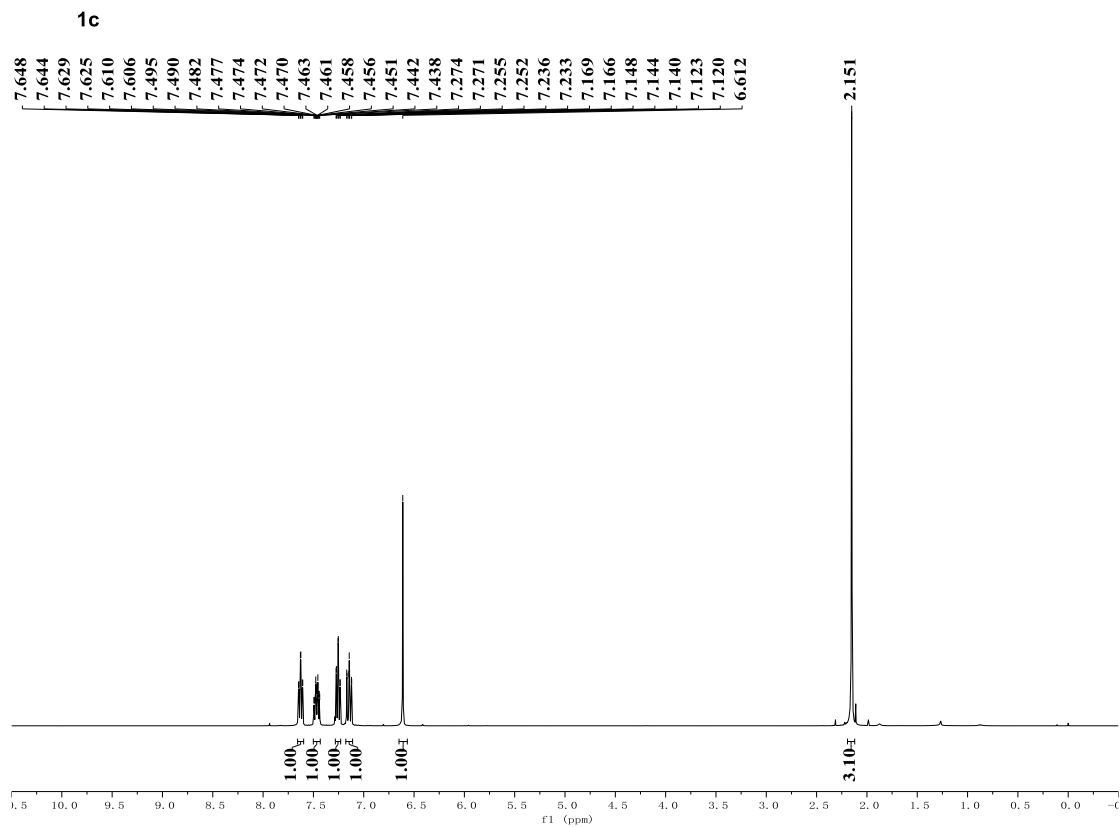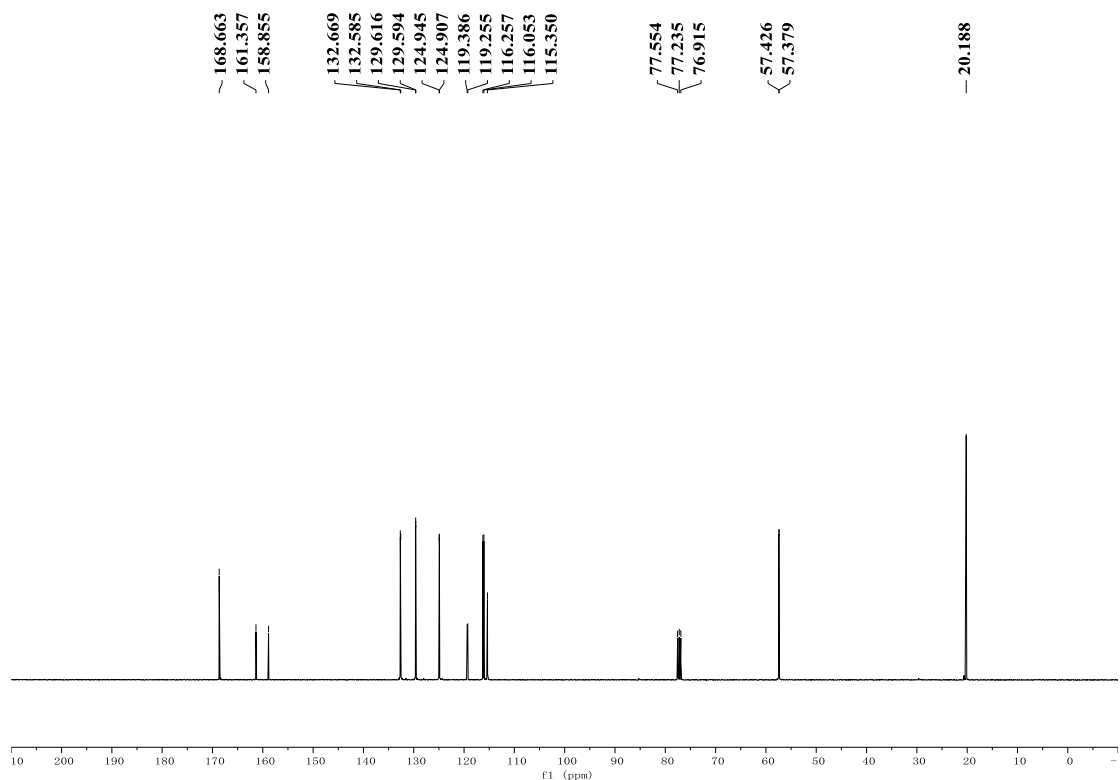

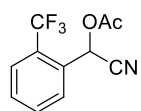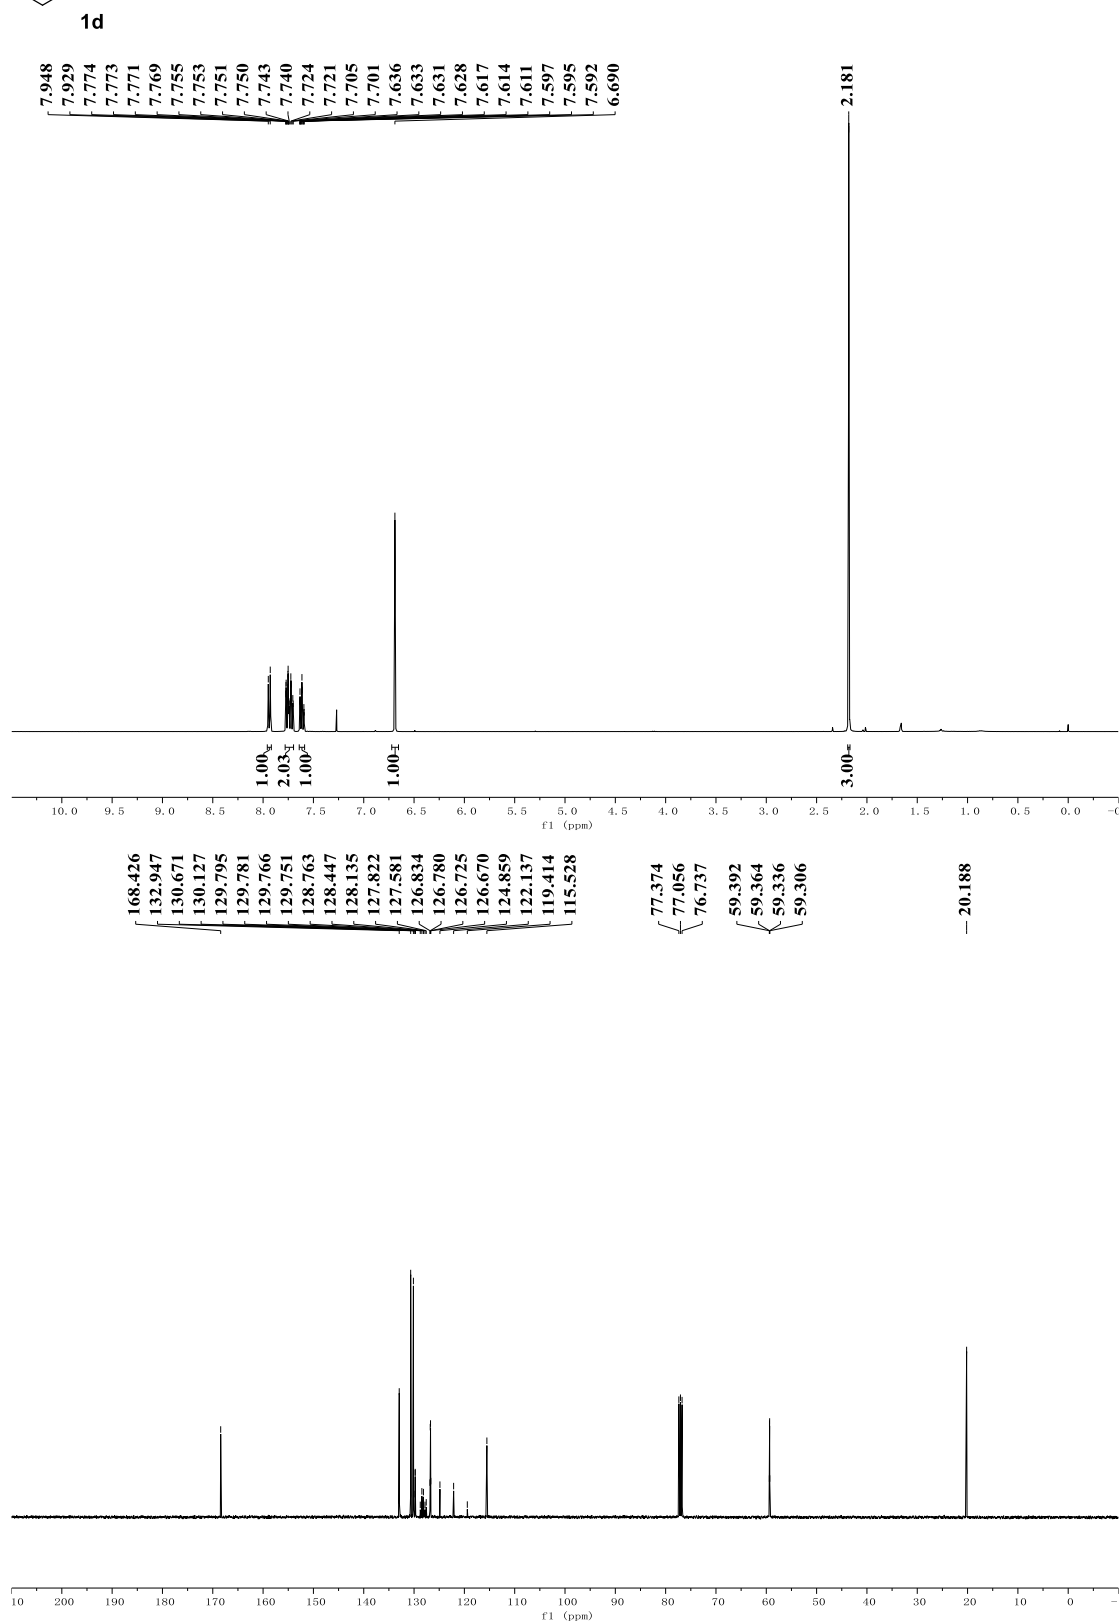

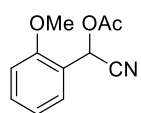

**1e**

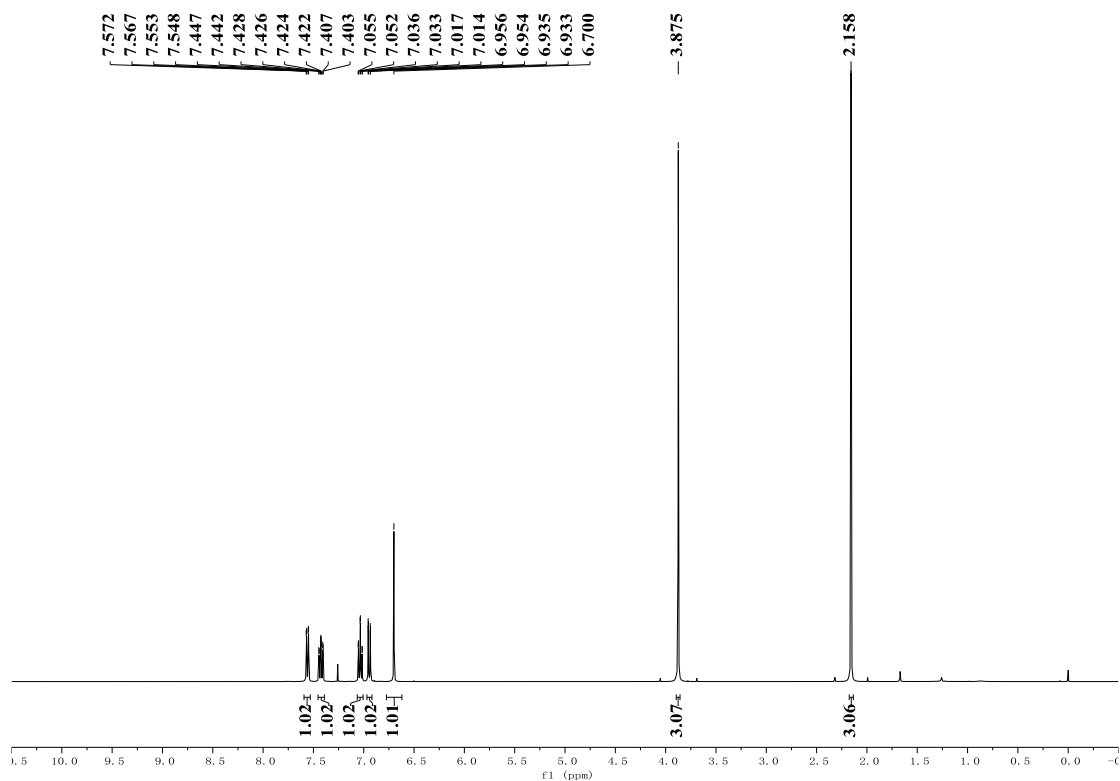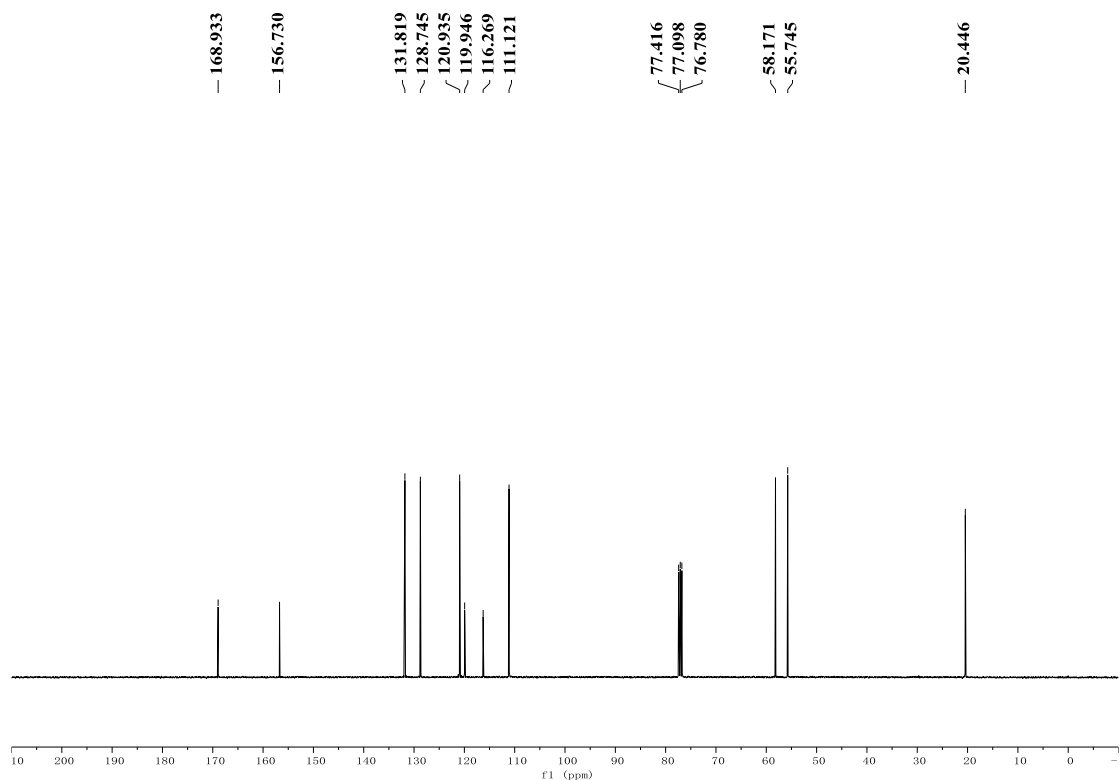

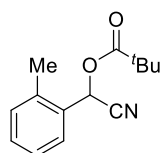

1f

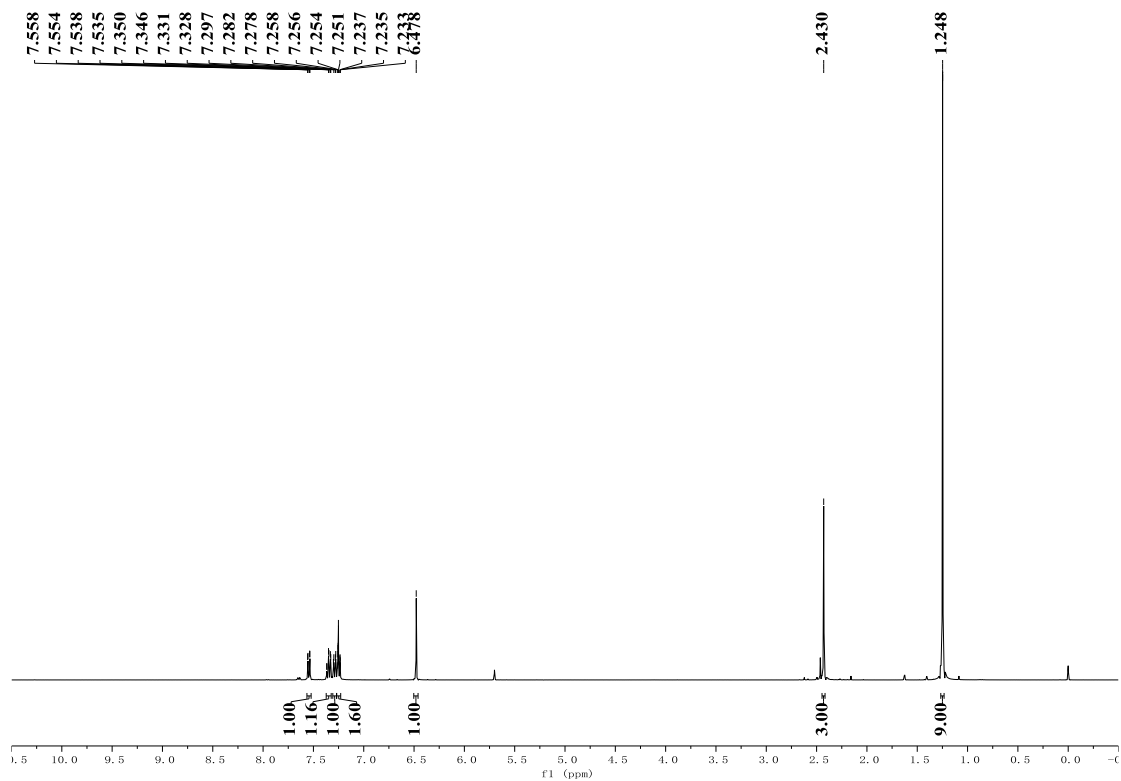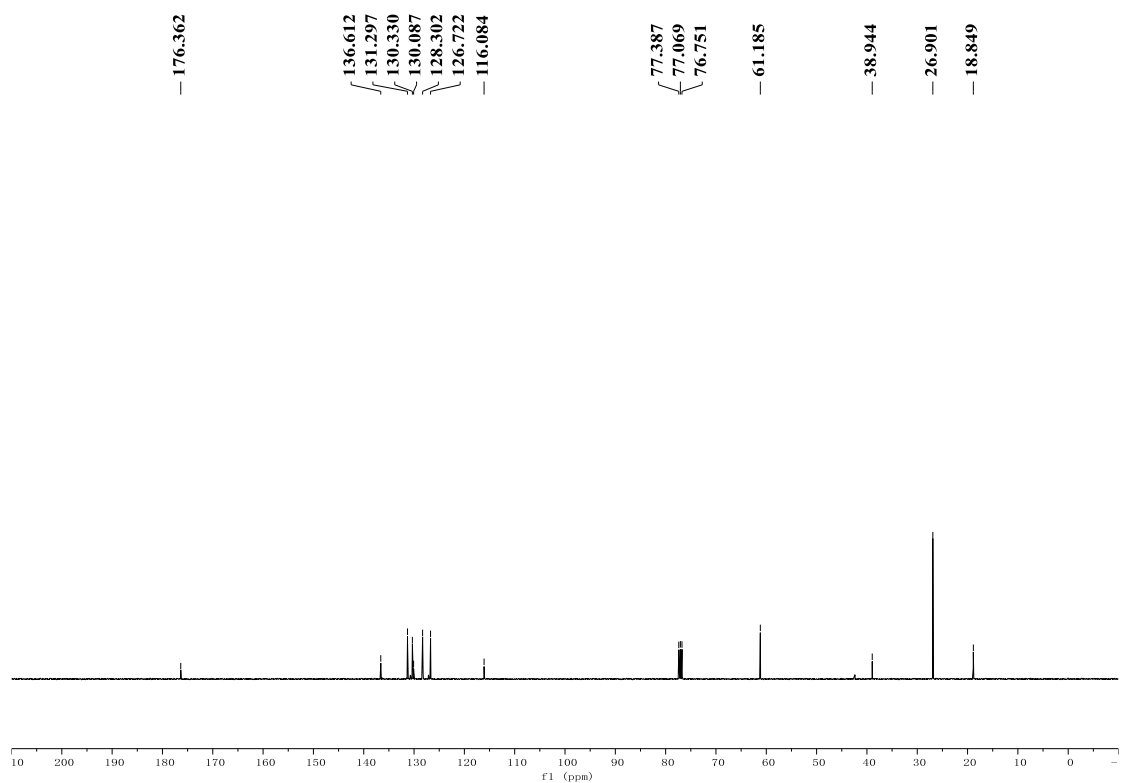

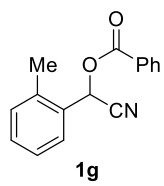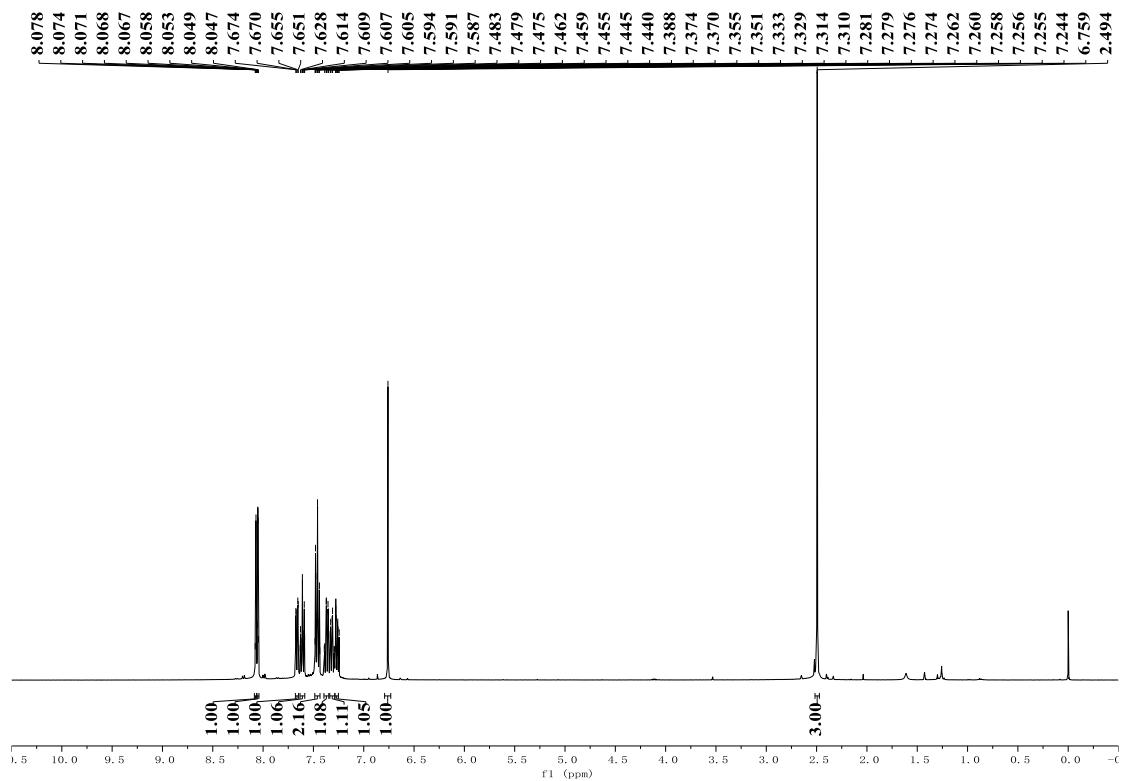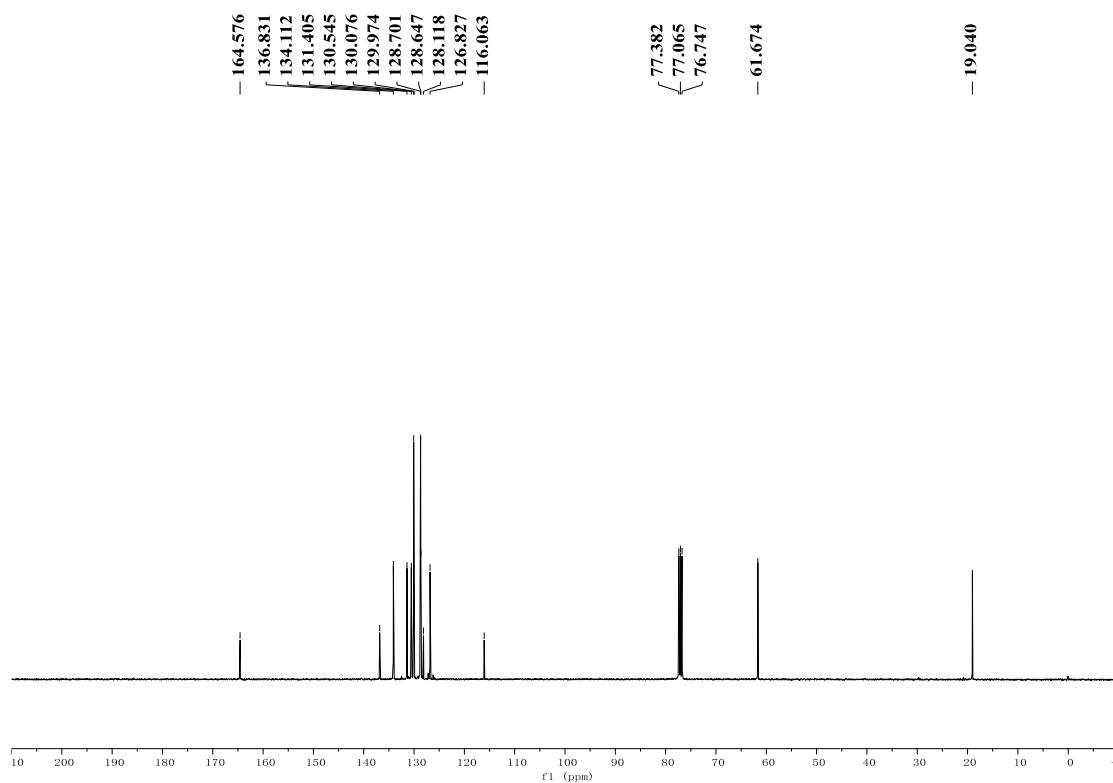

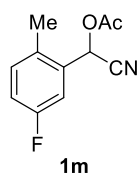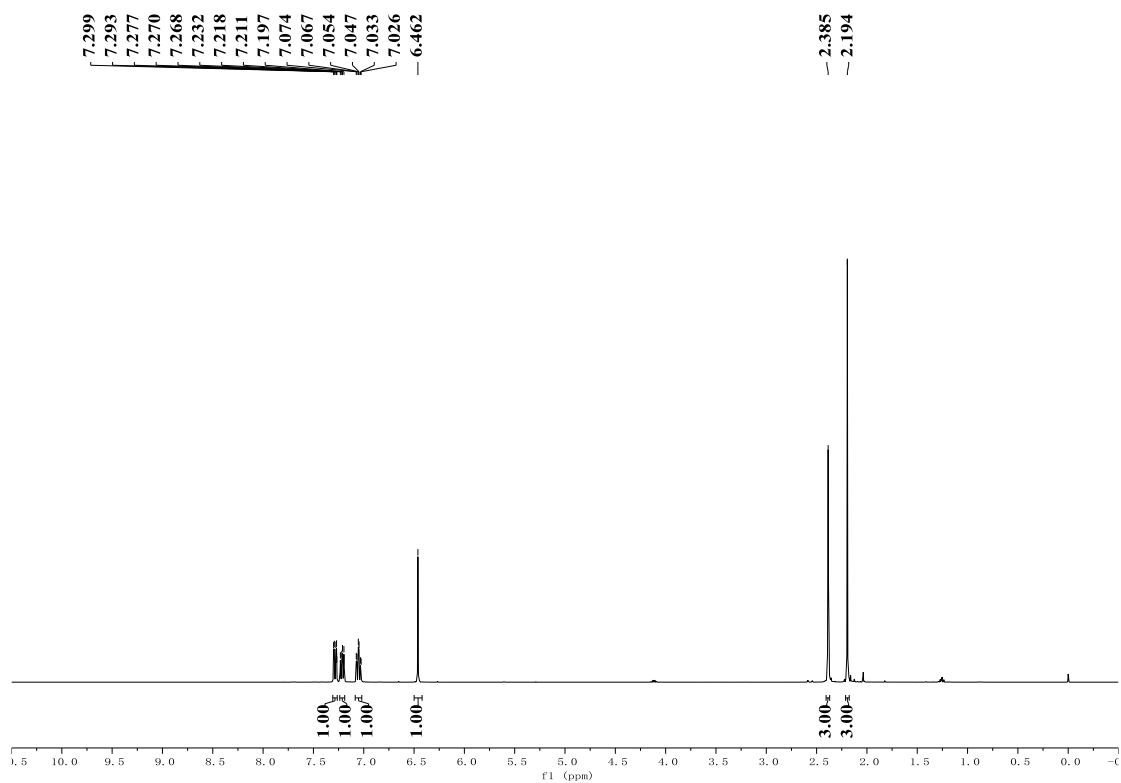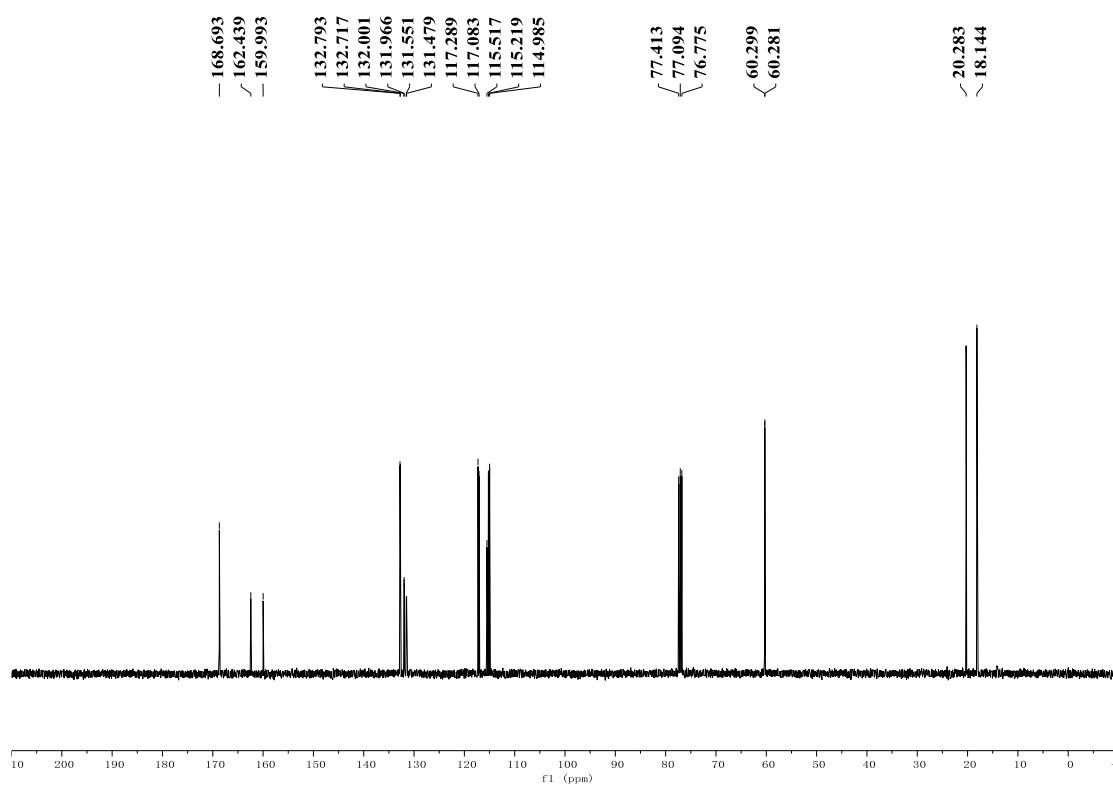

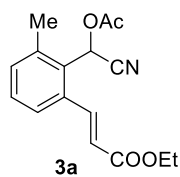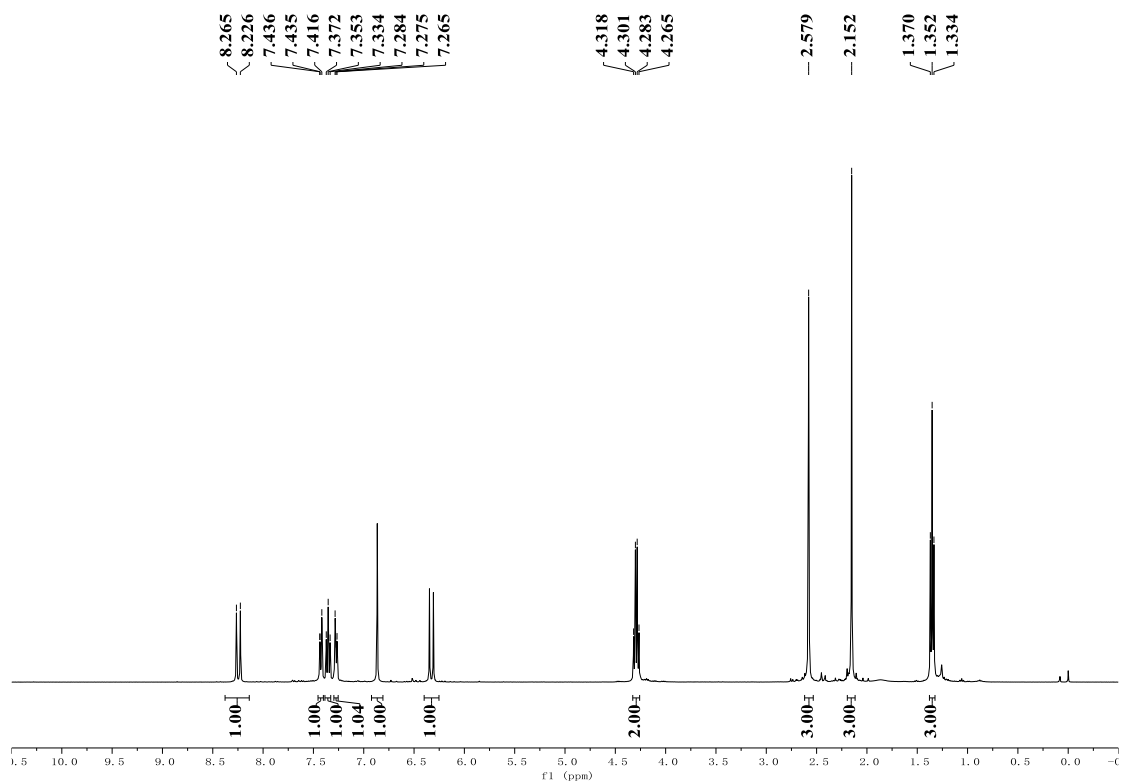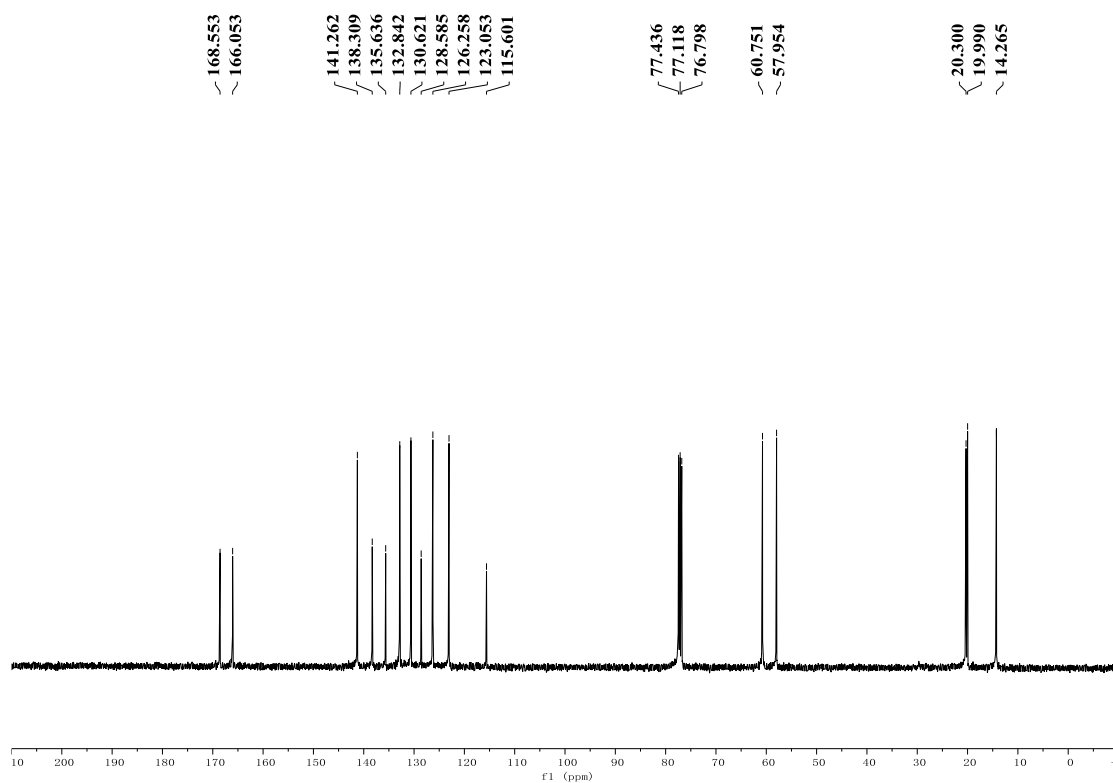



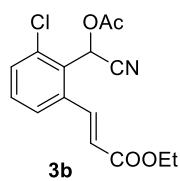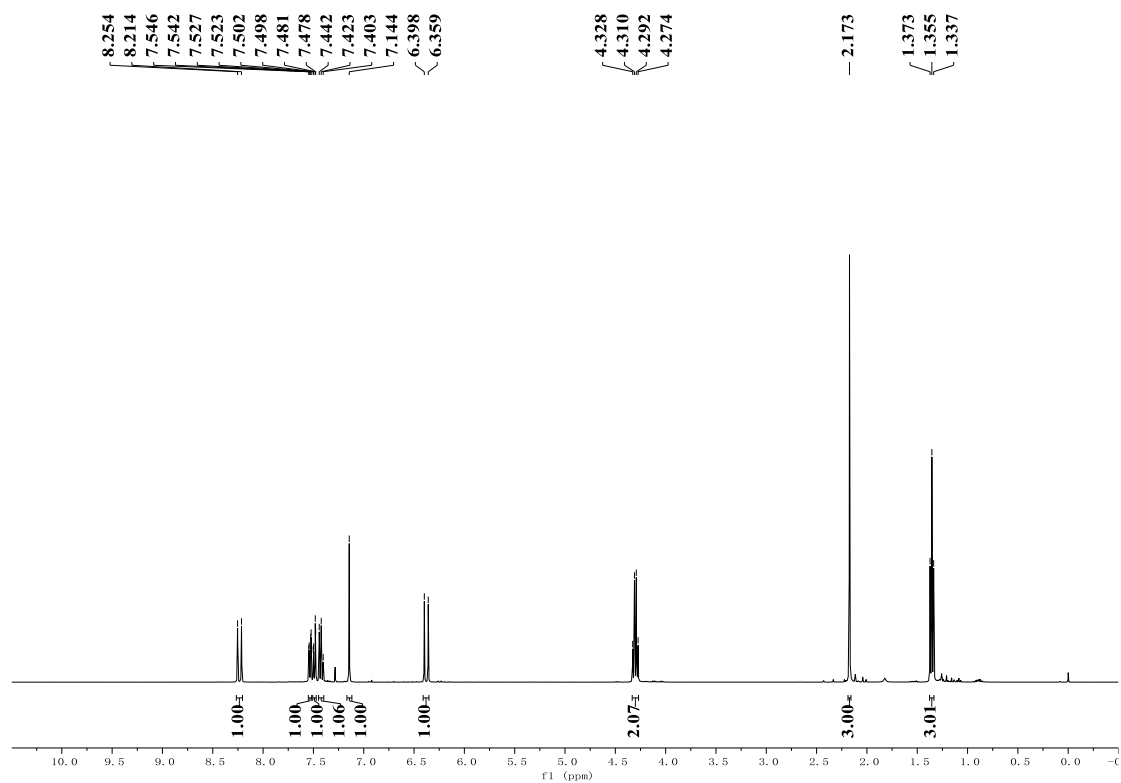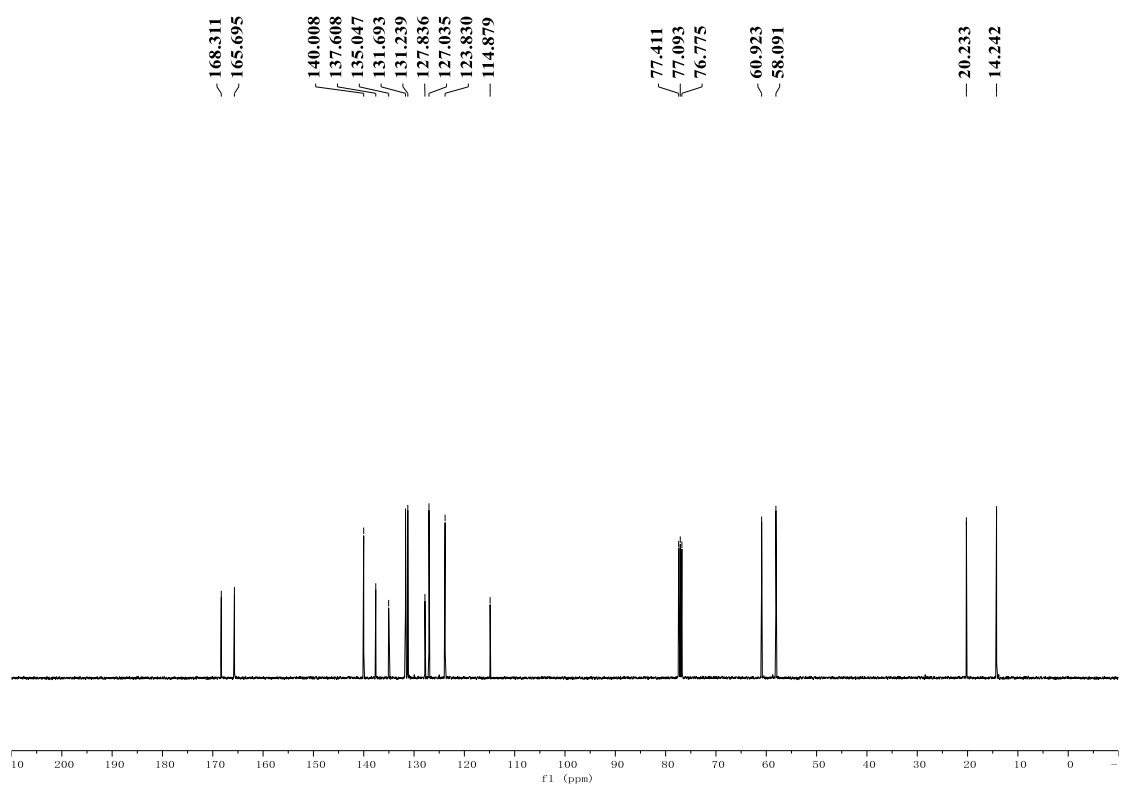

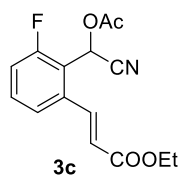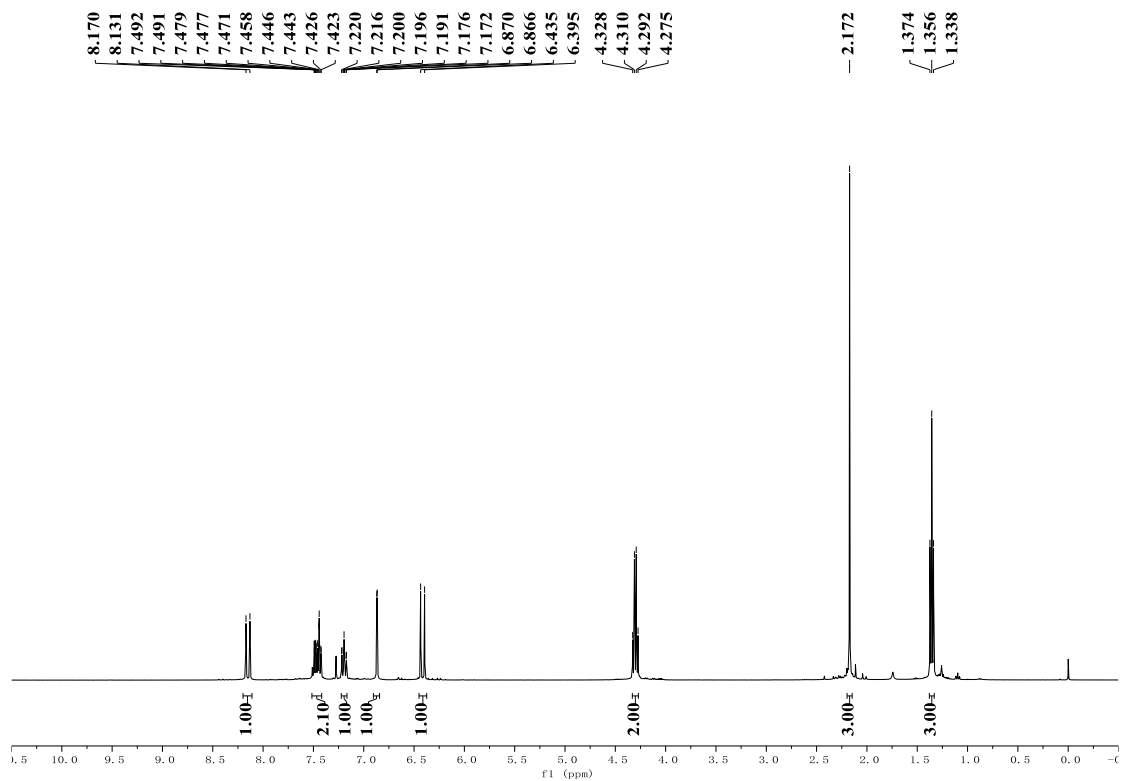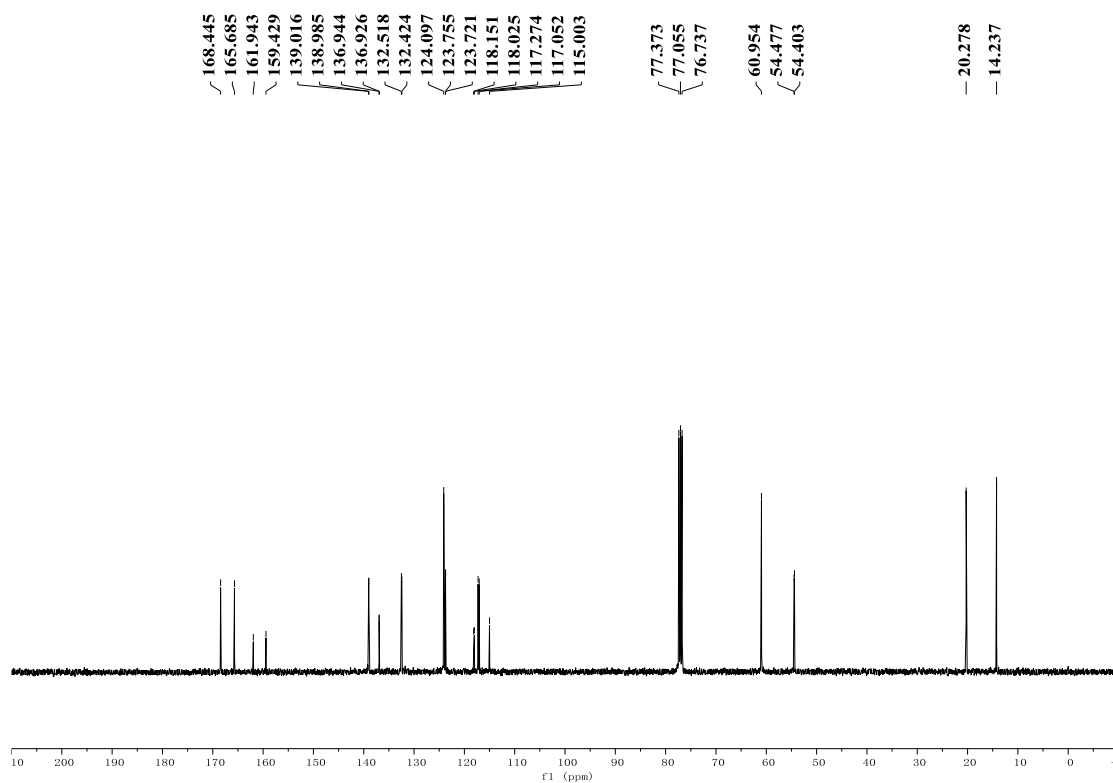

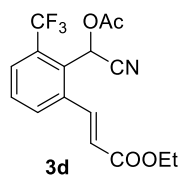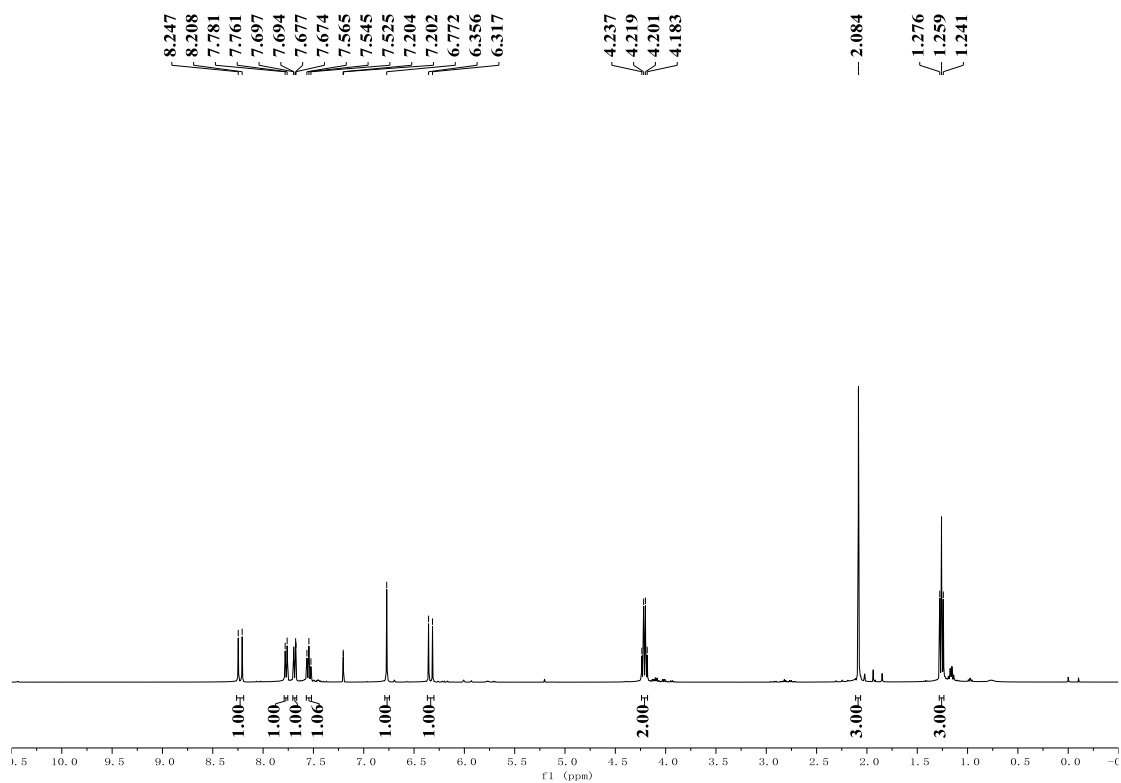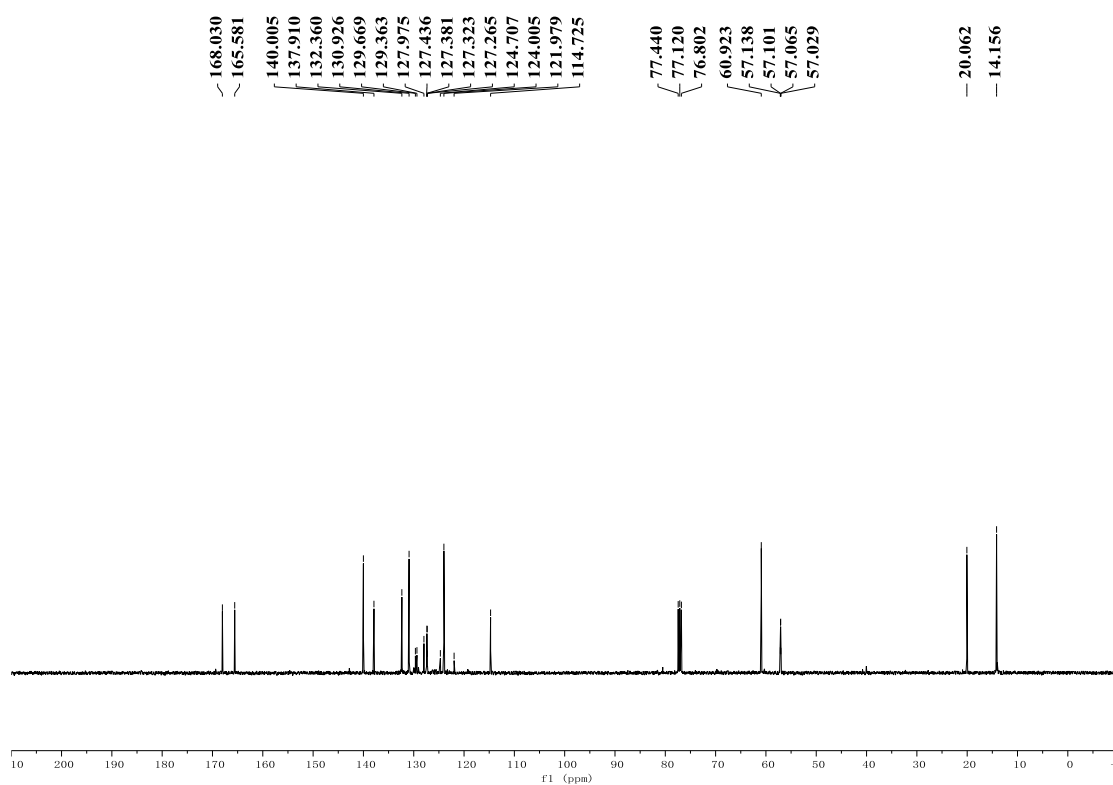

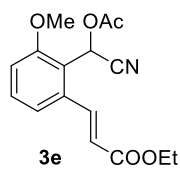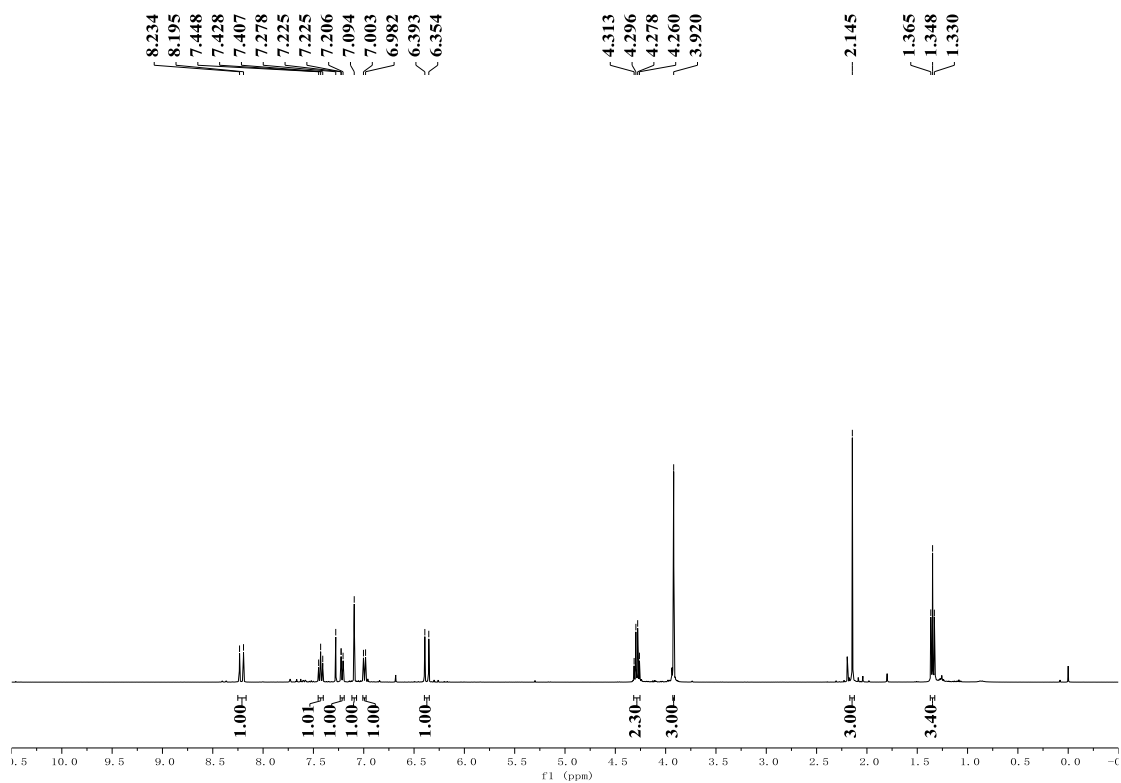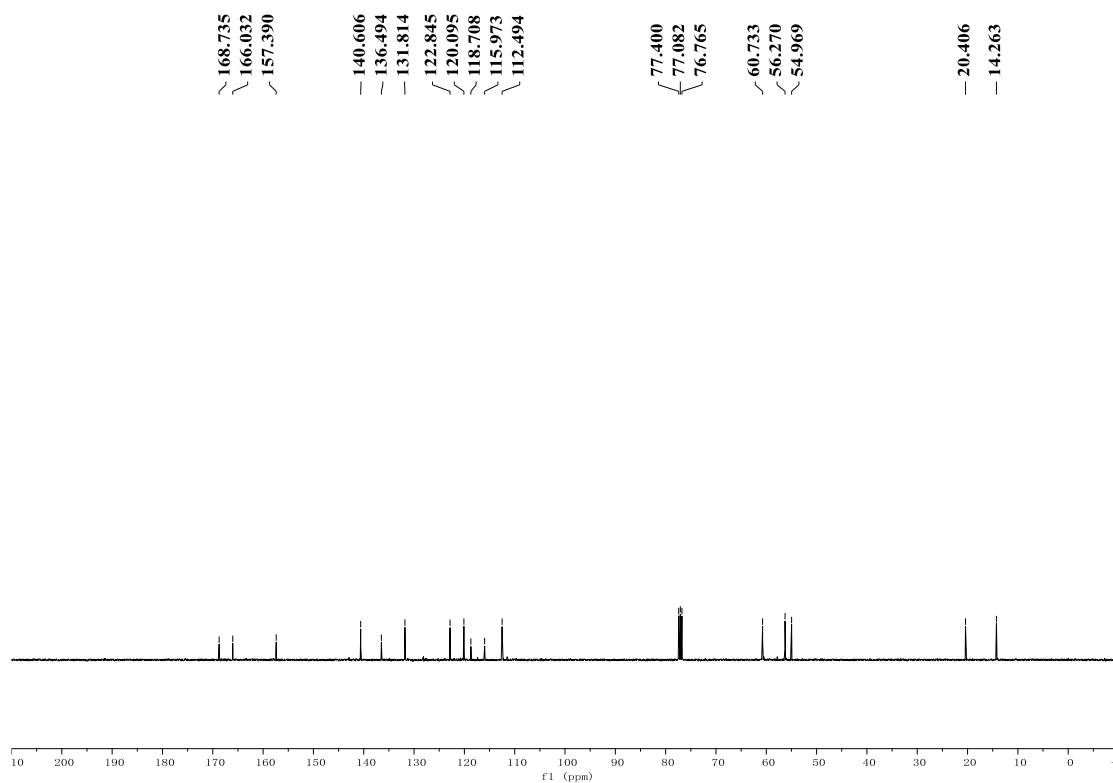

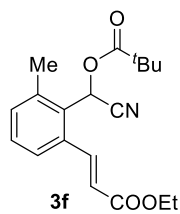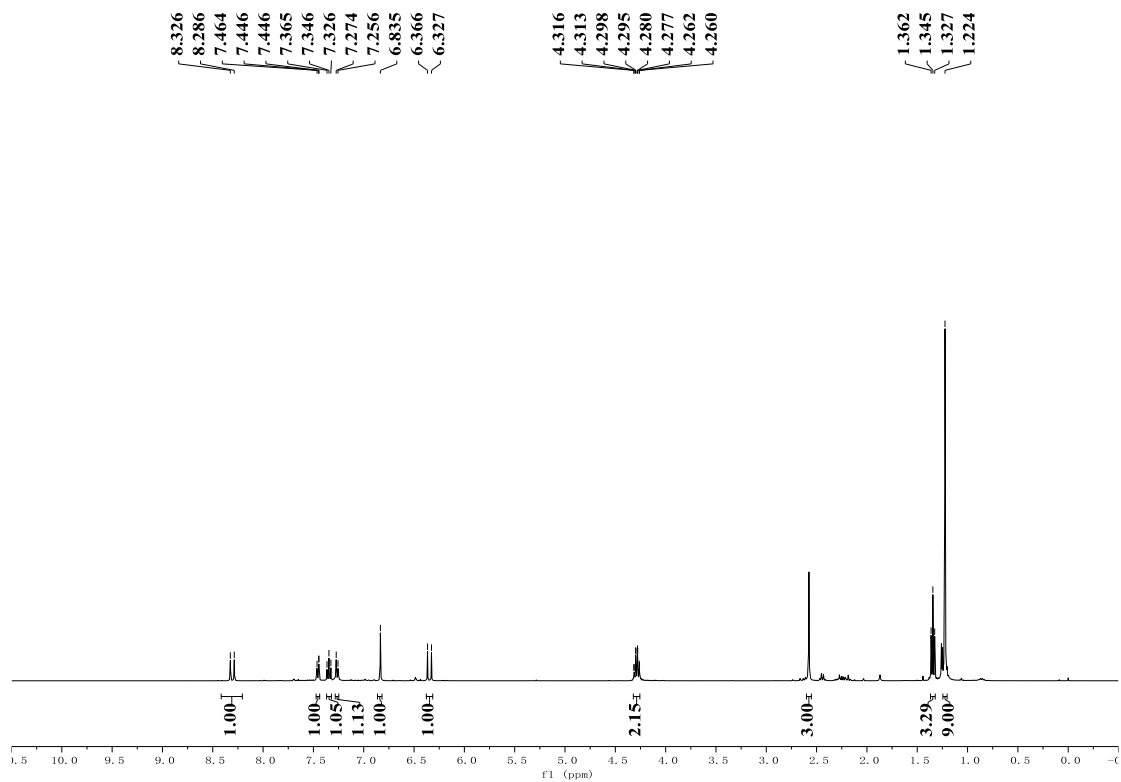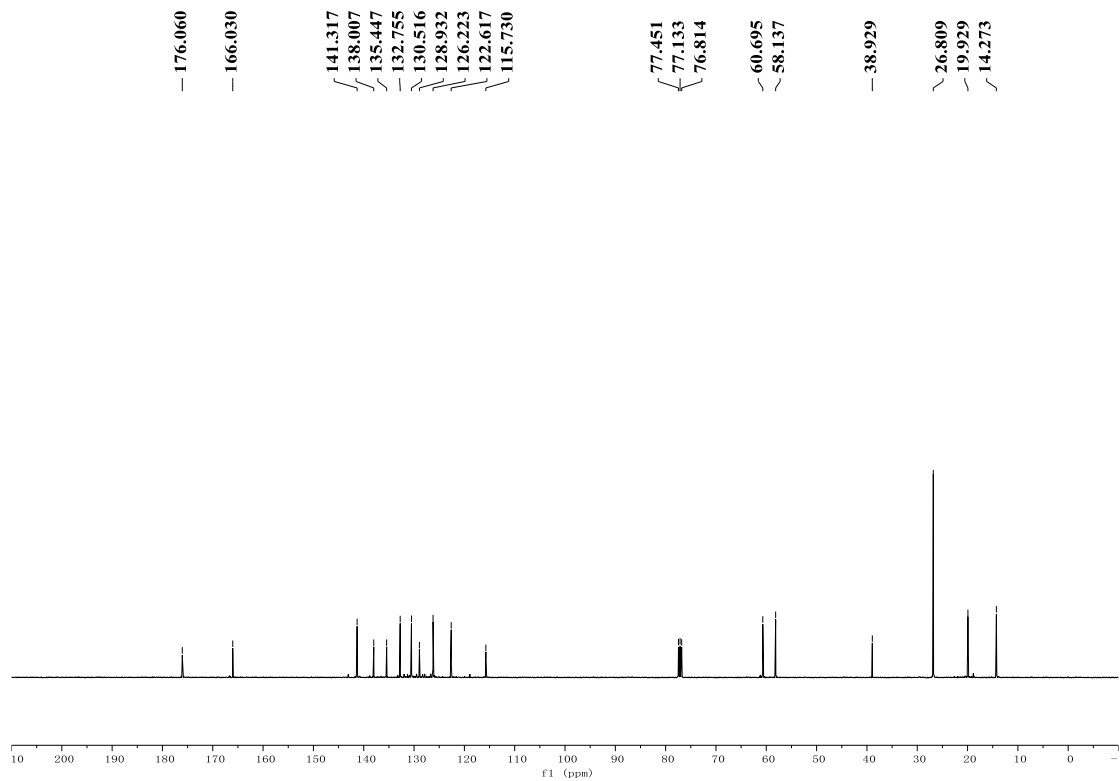

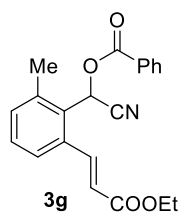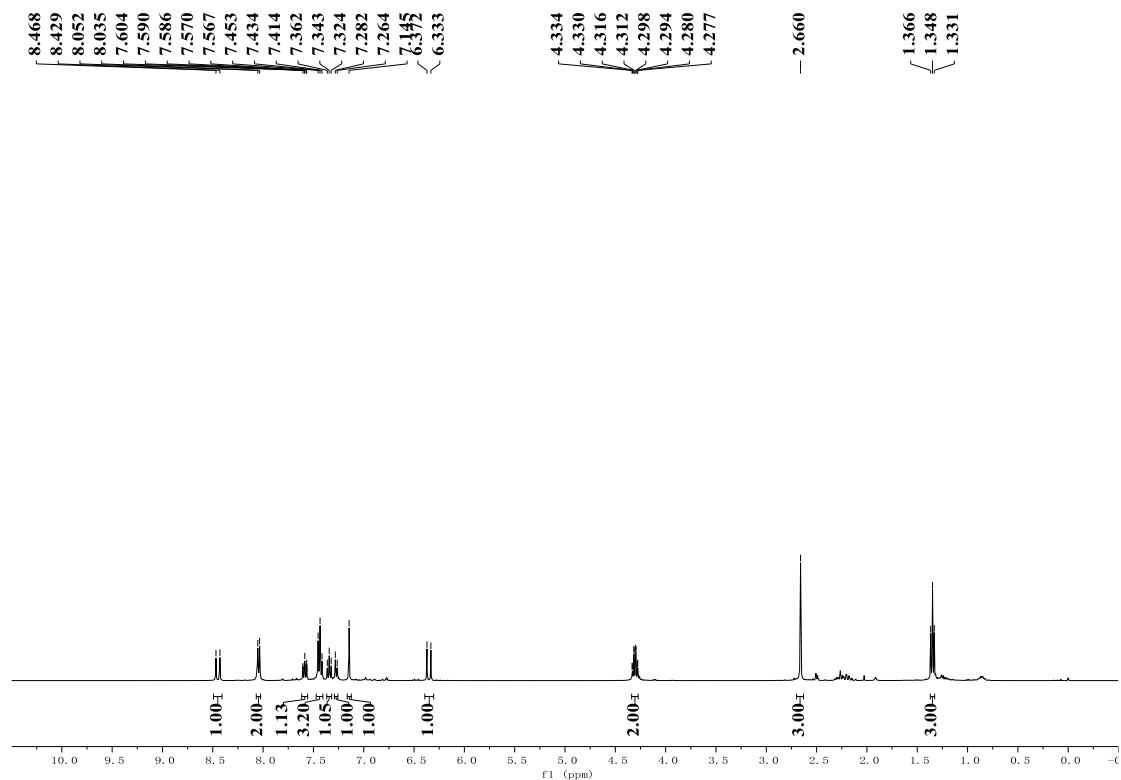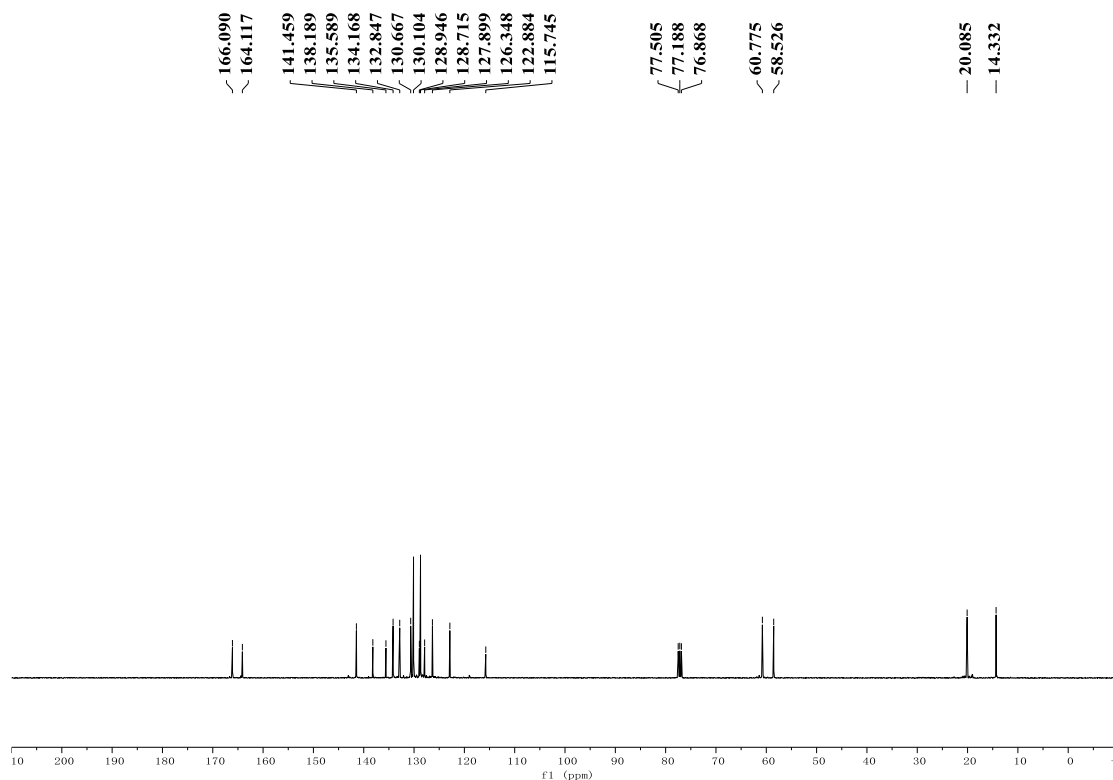

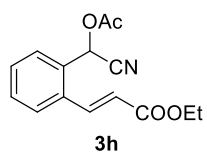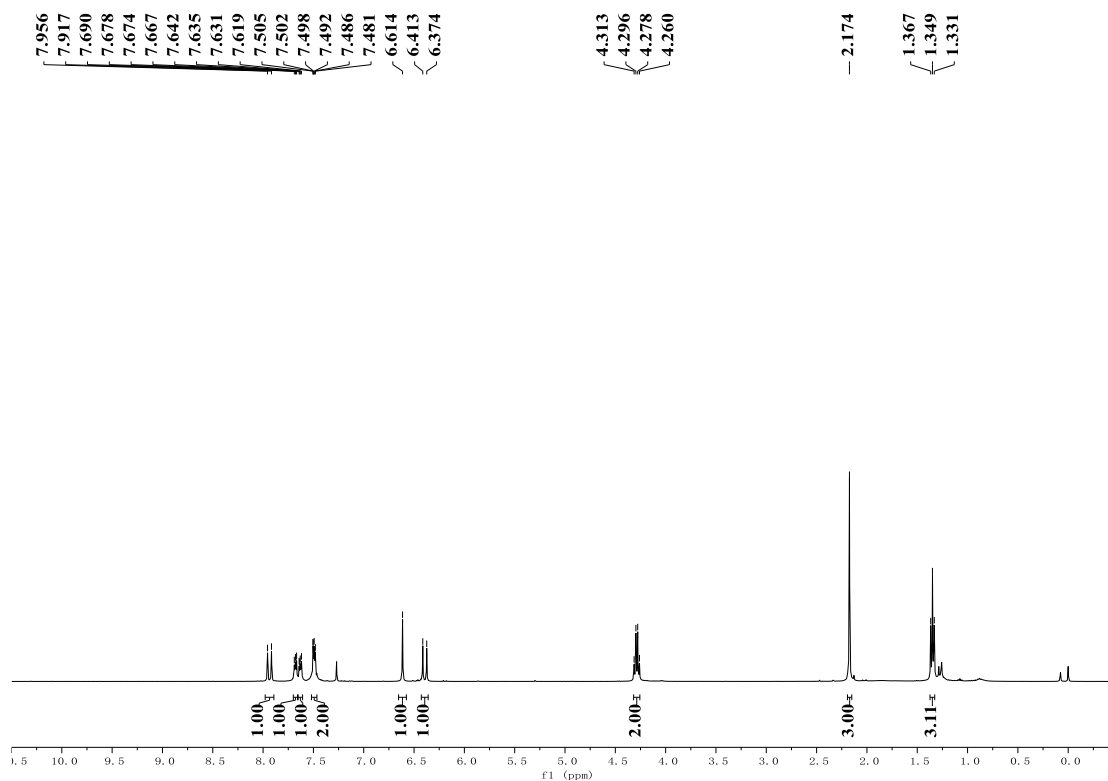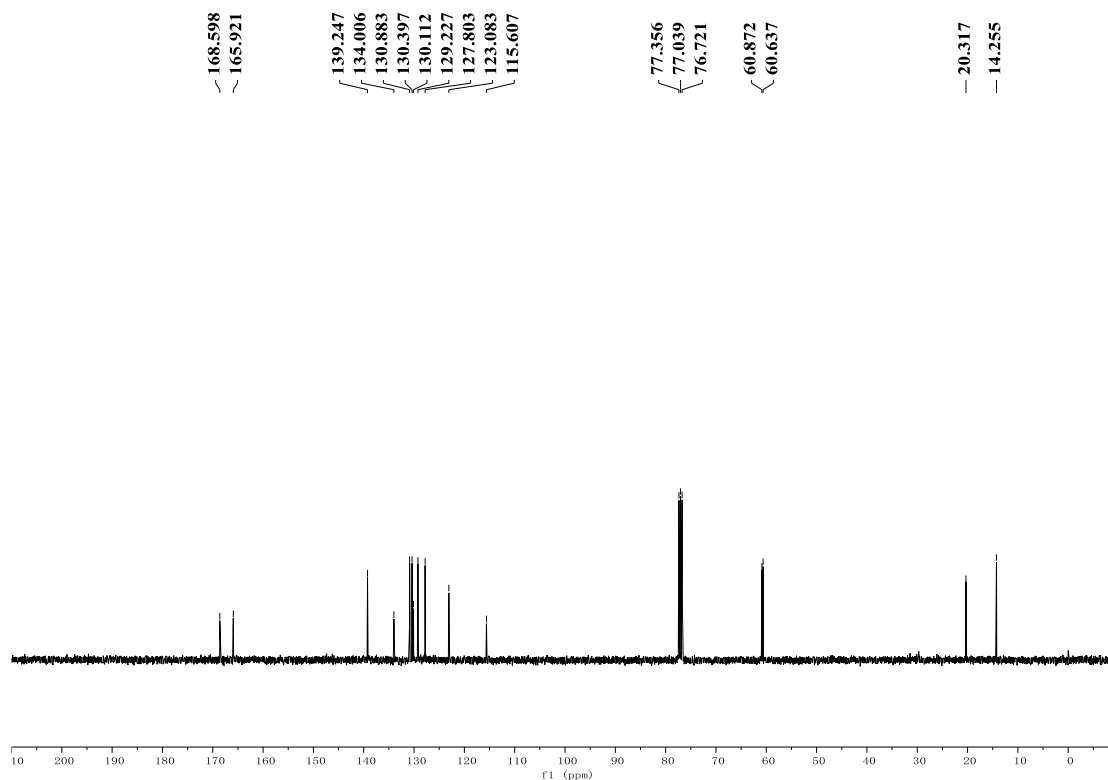

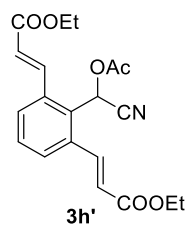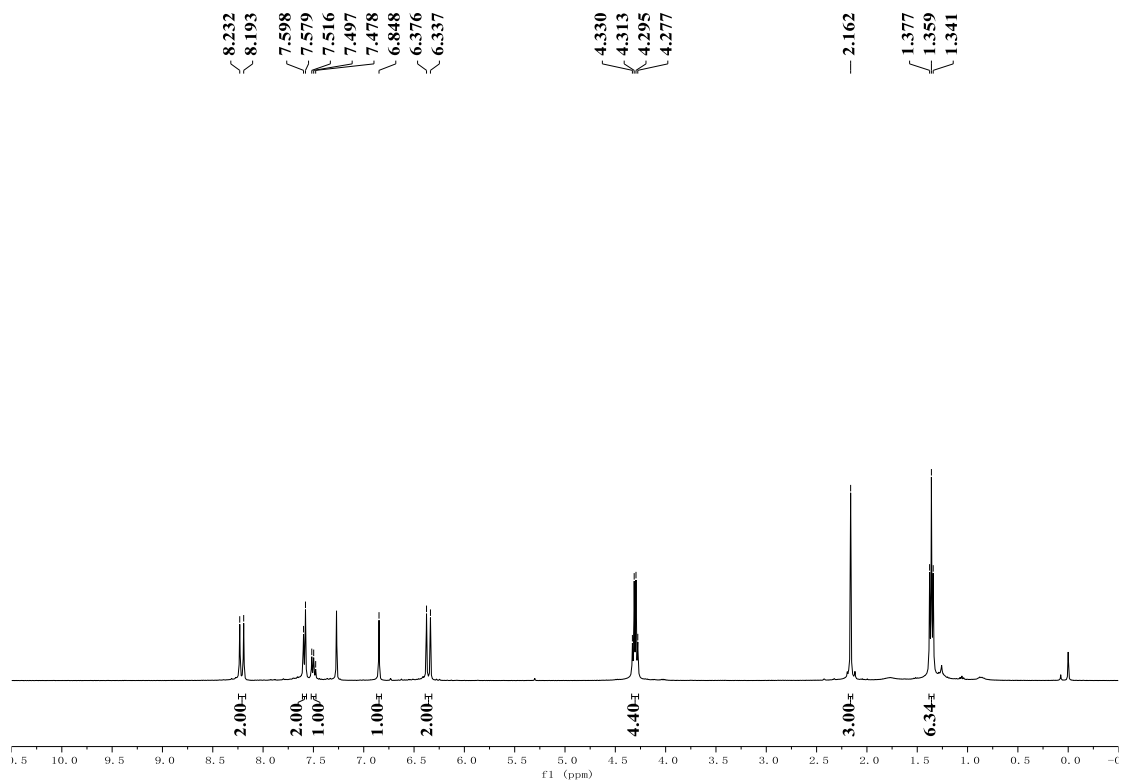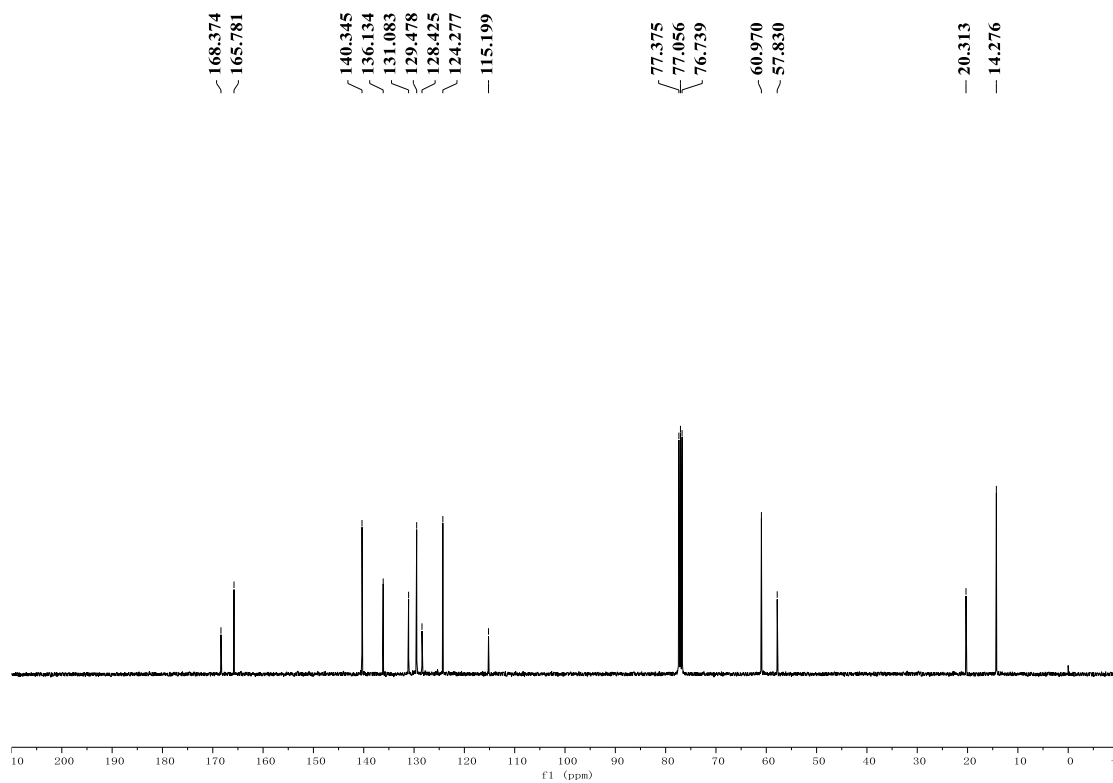



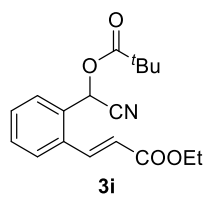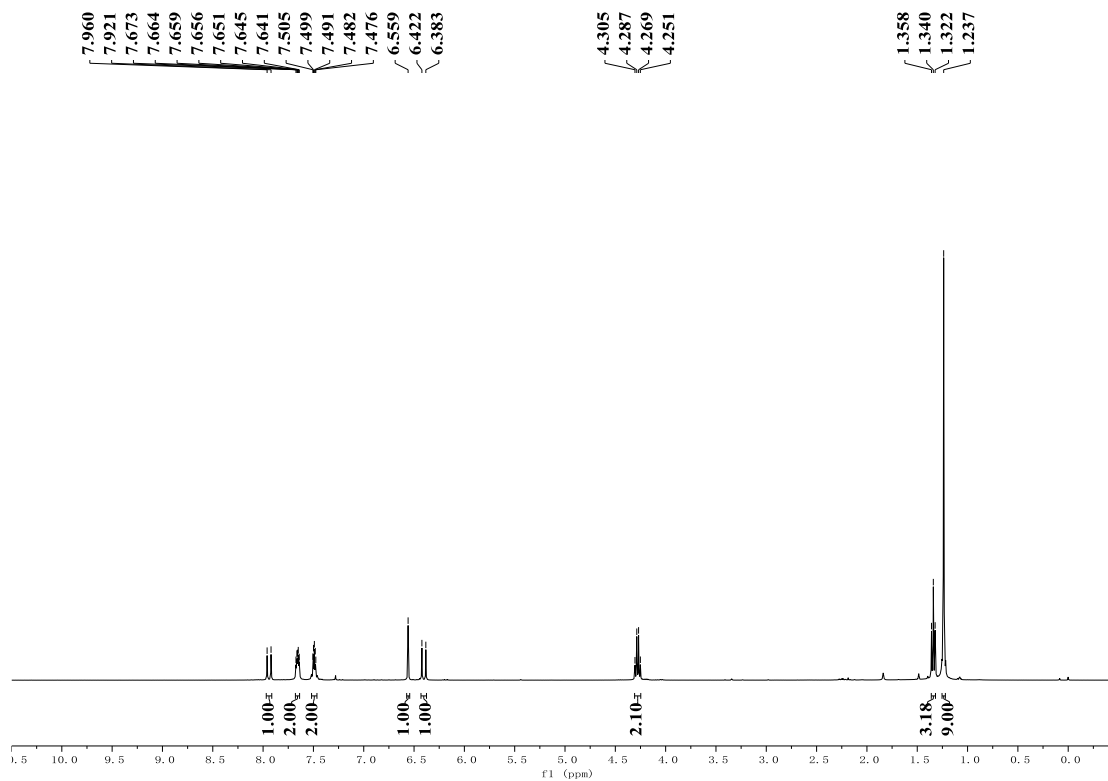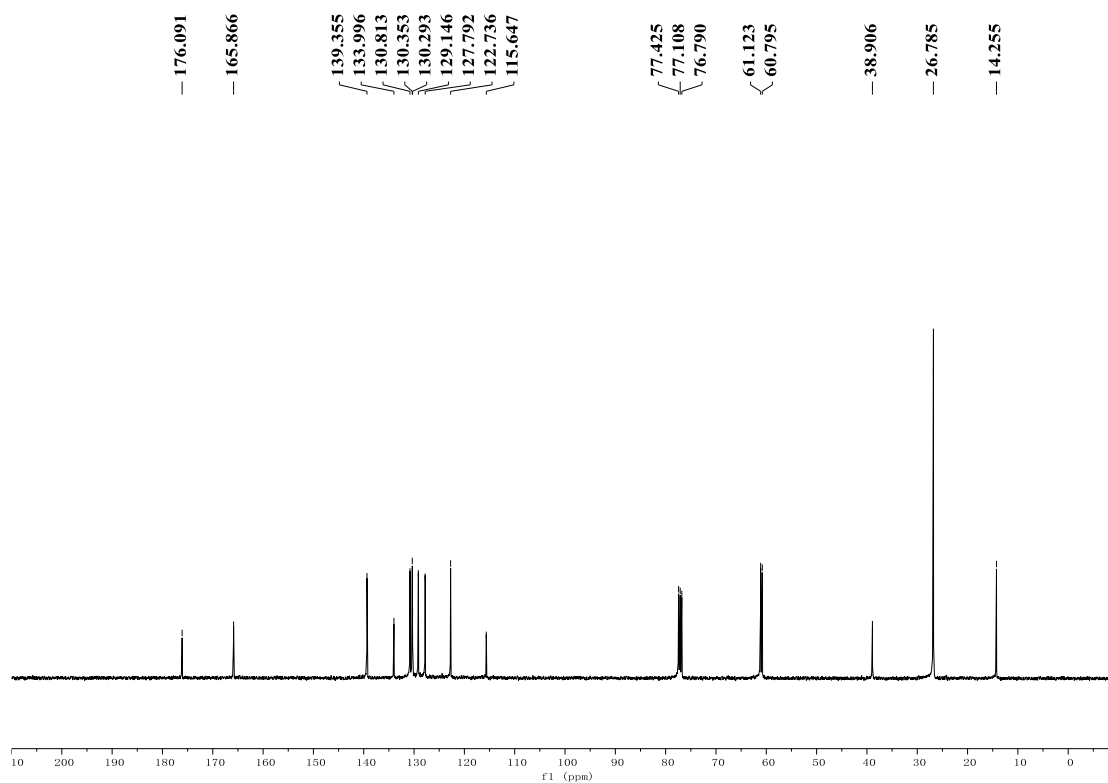

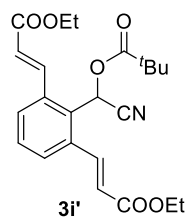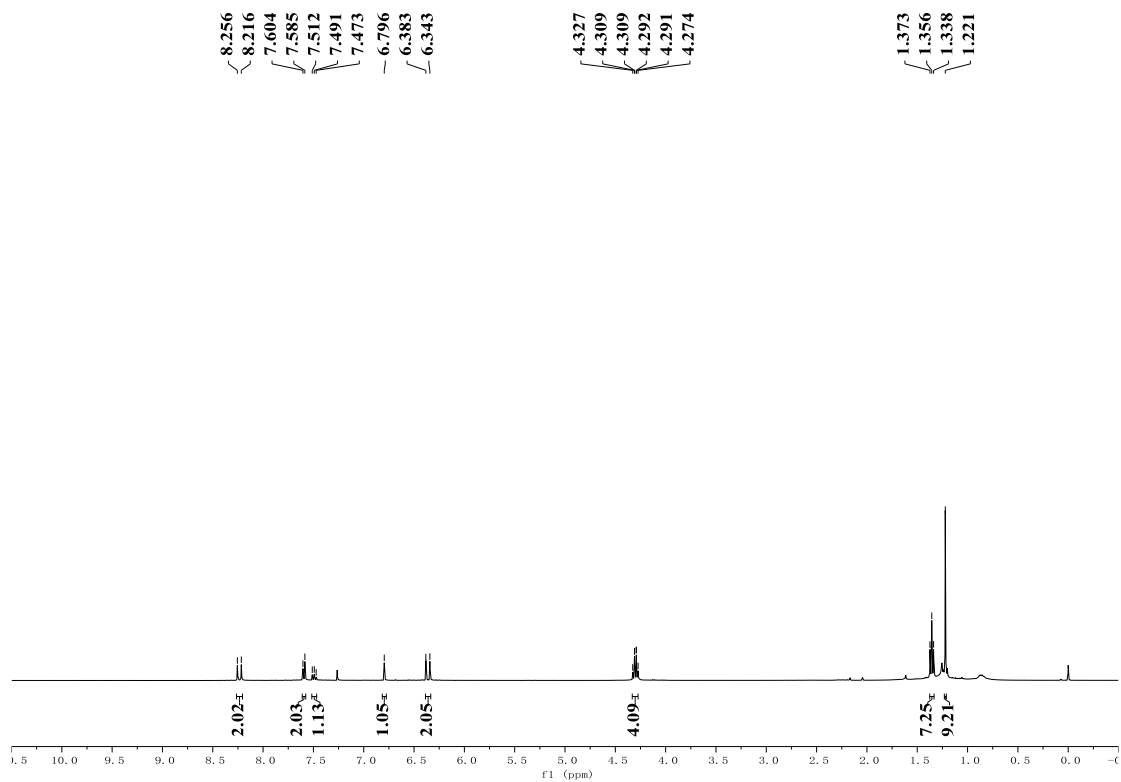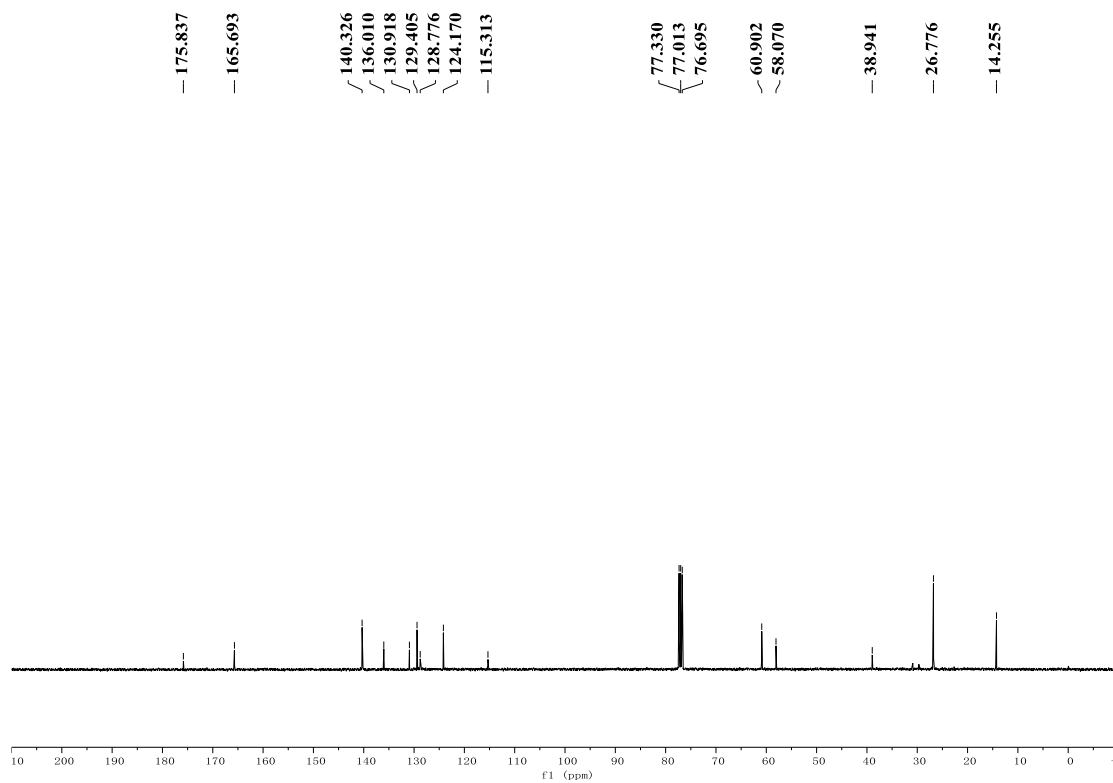

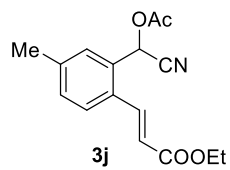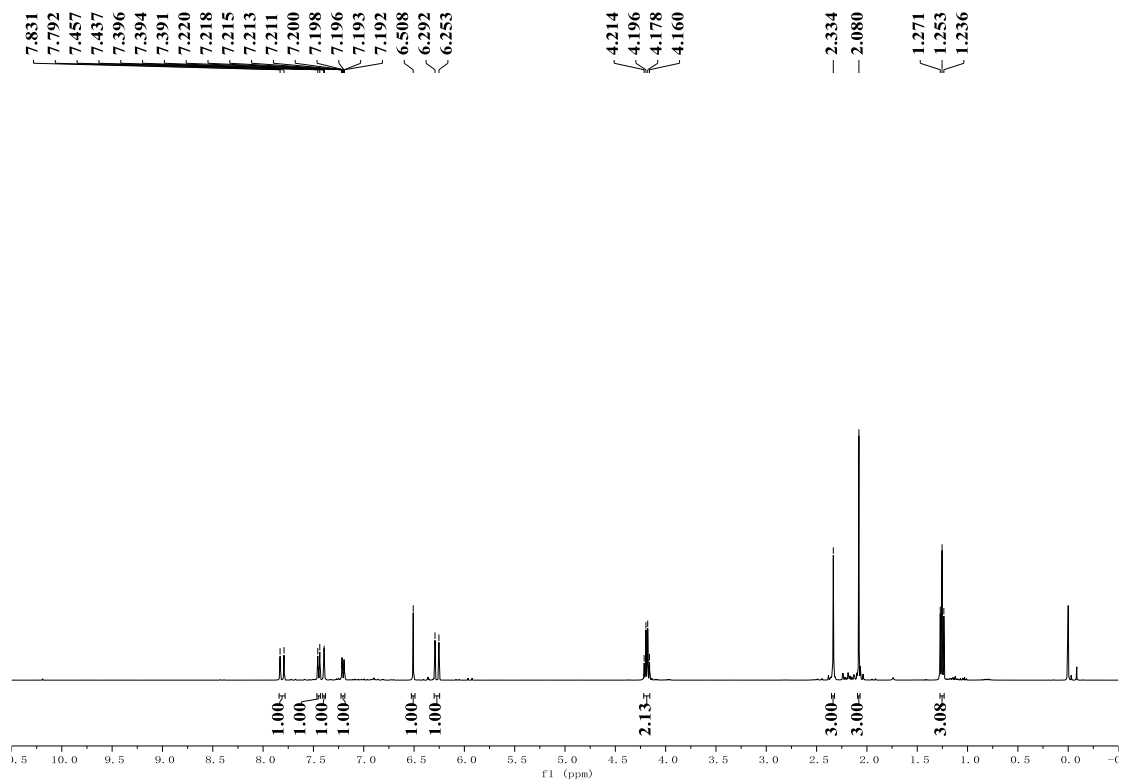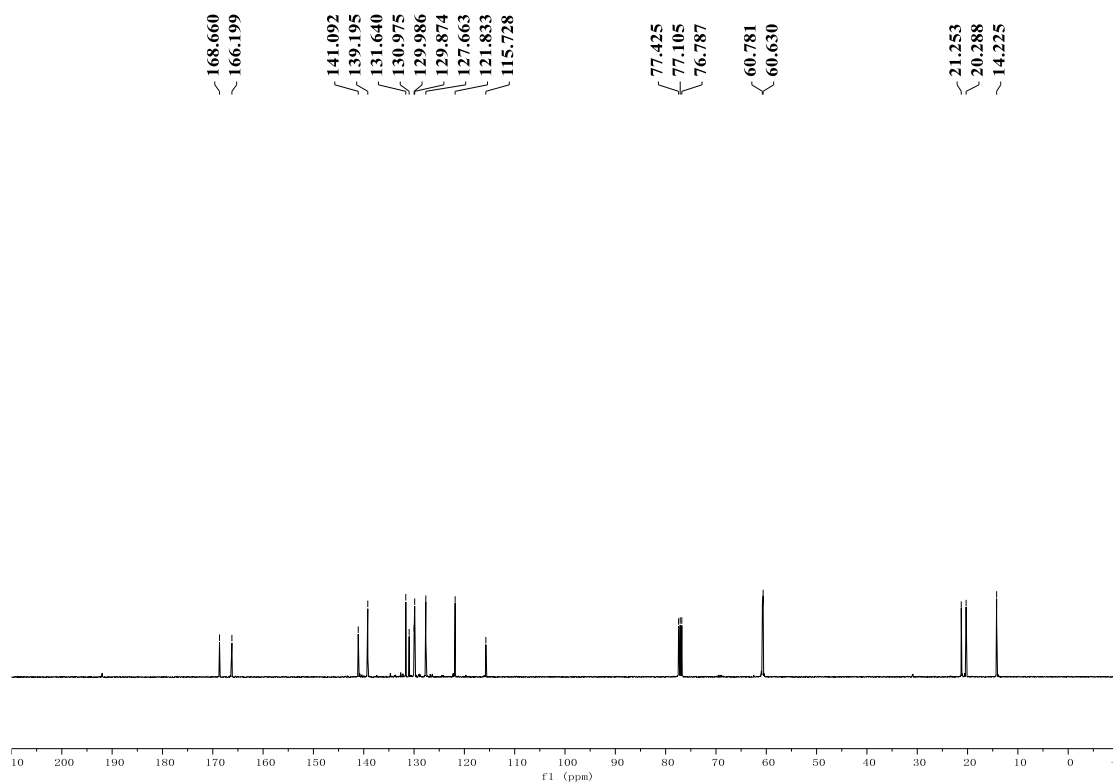

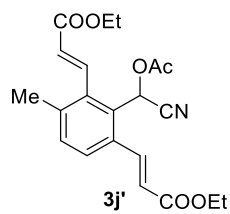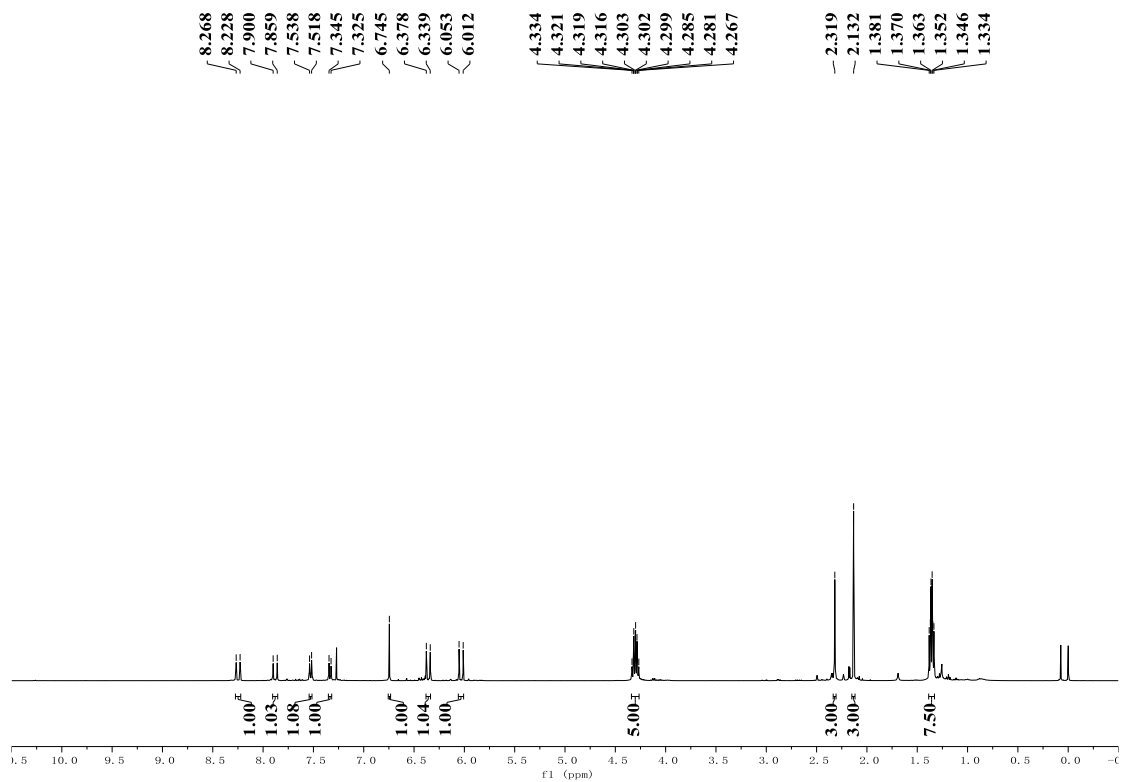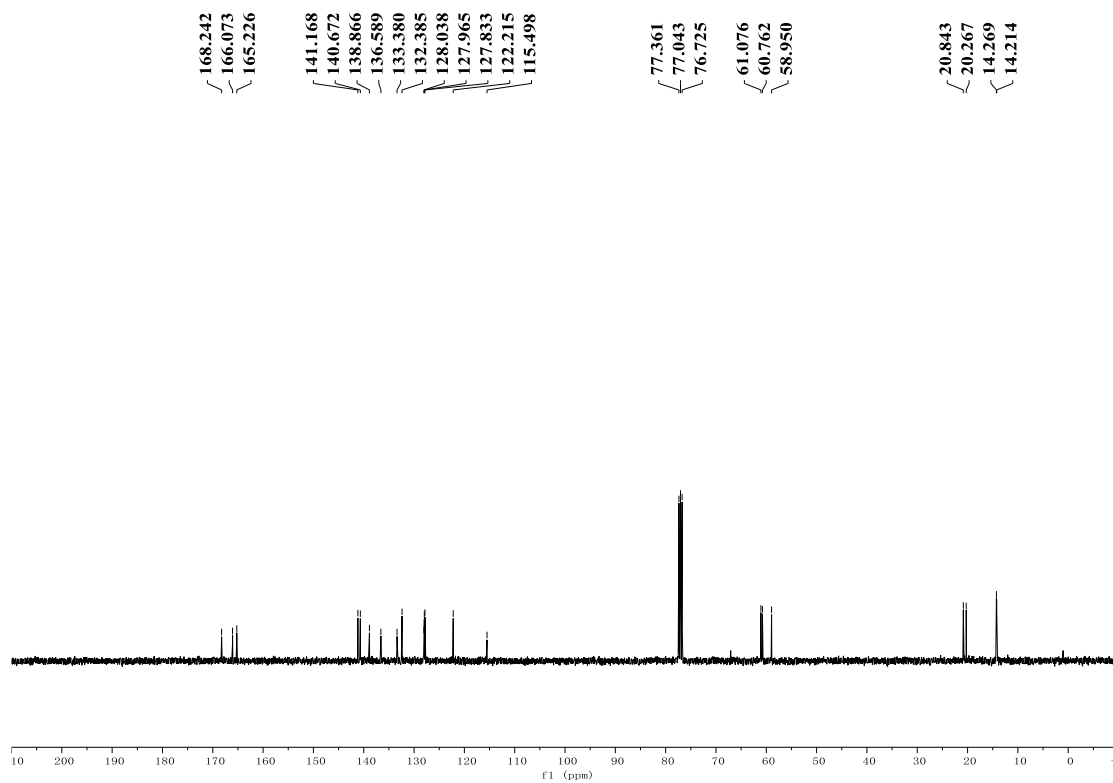

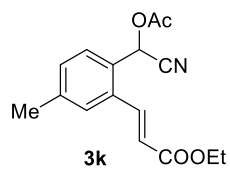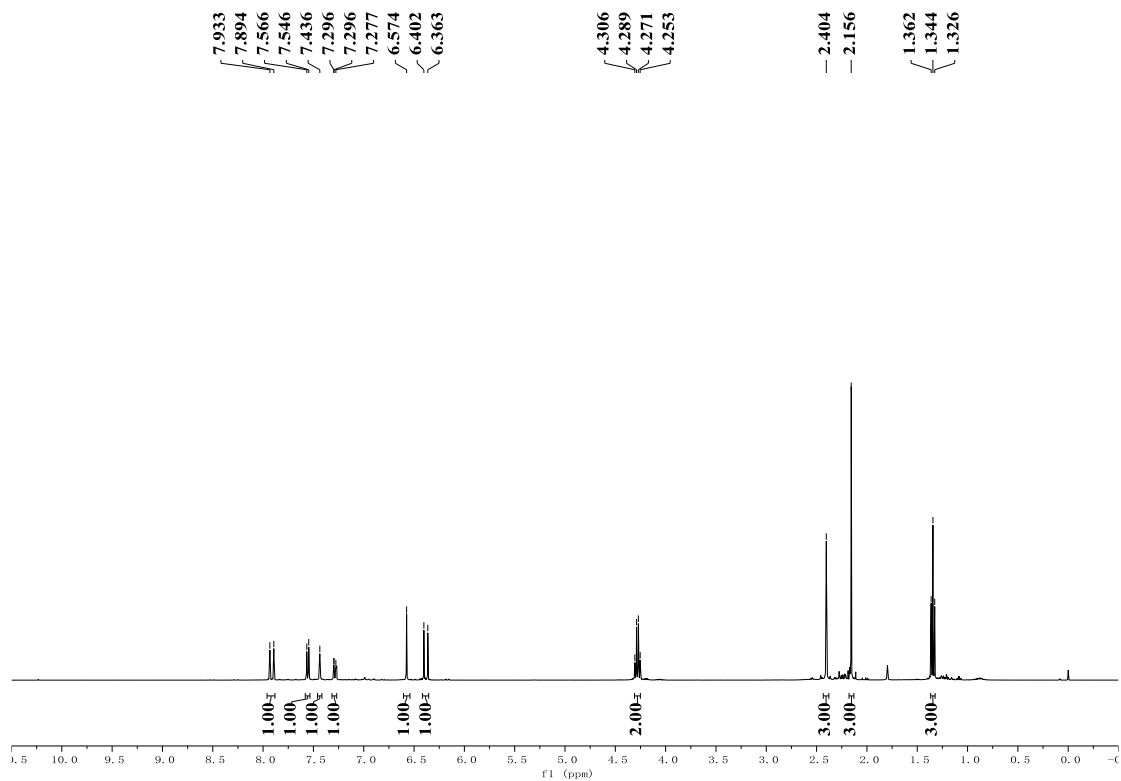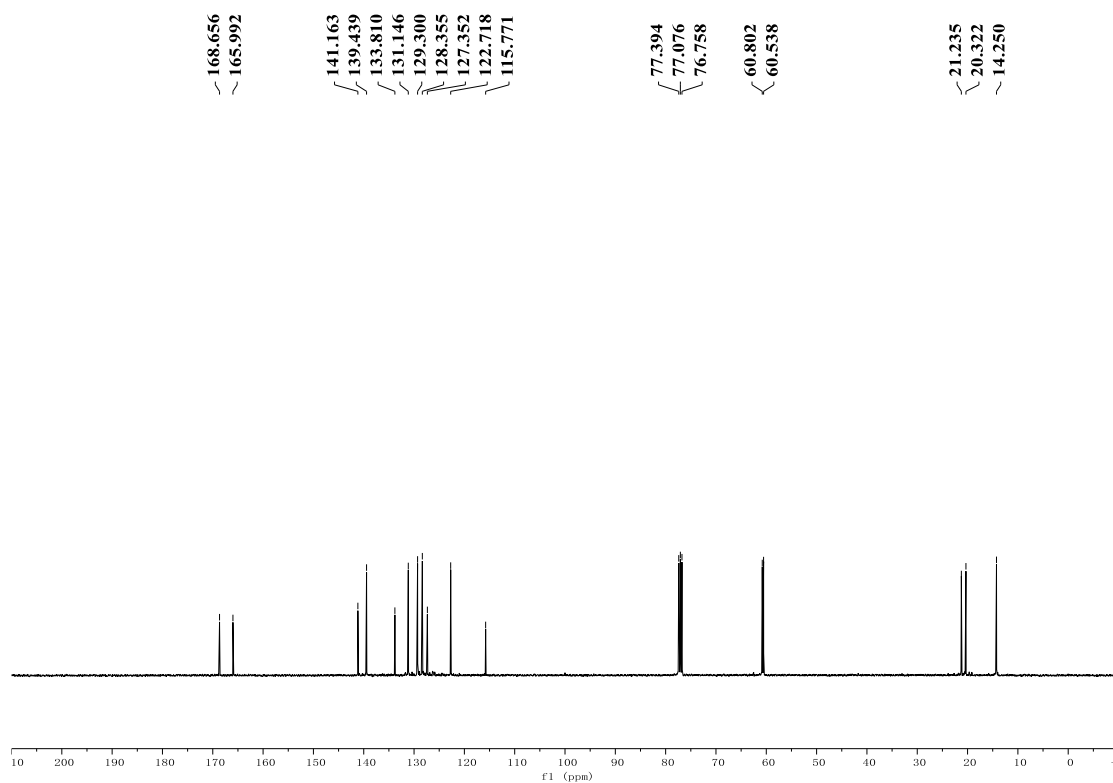

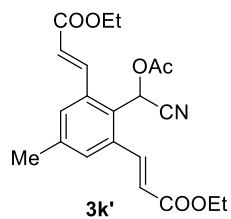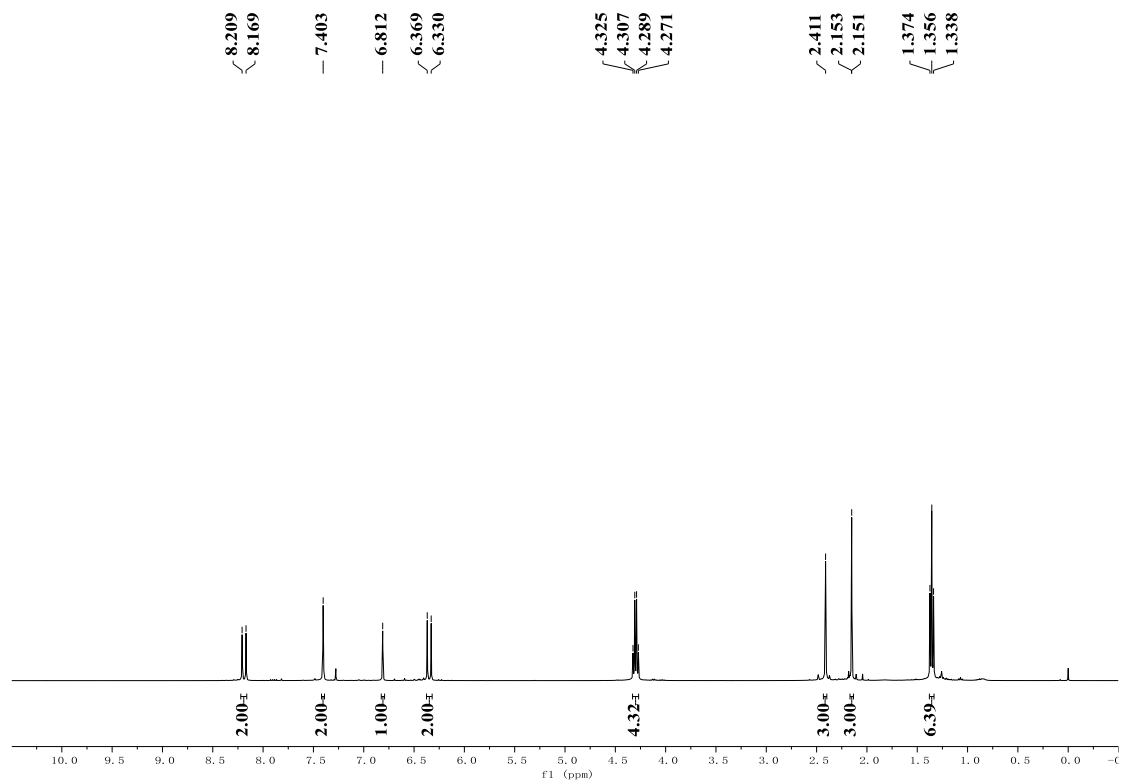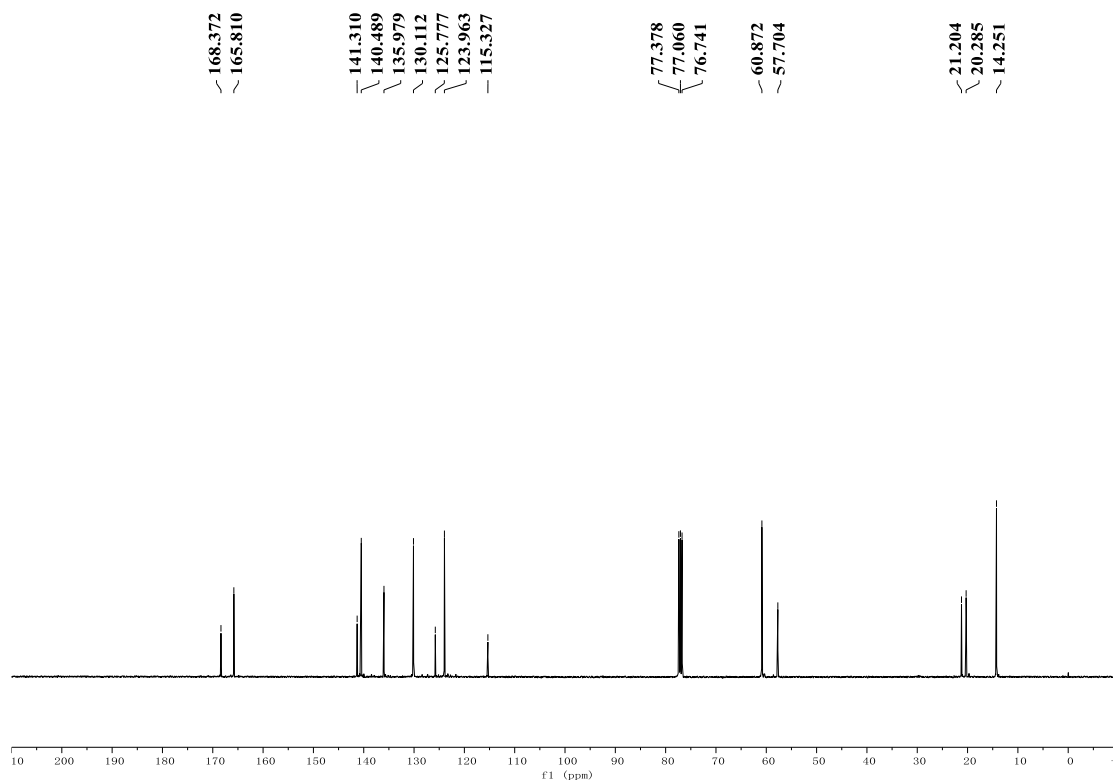

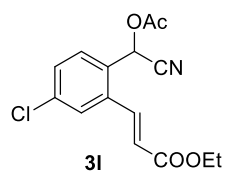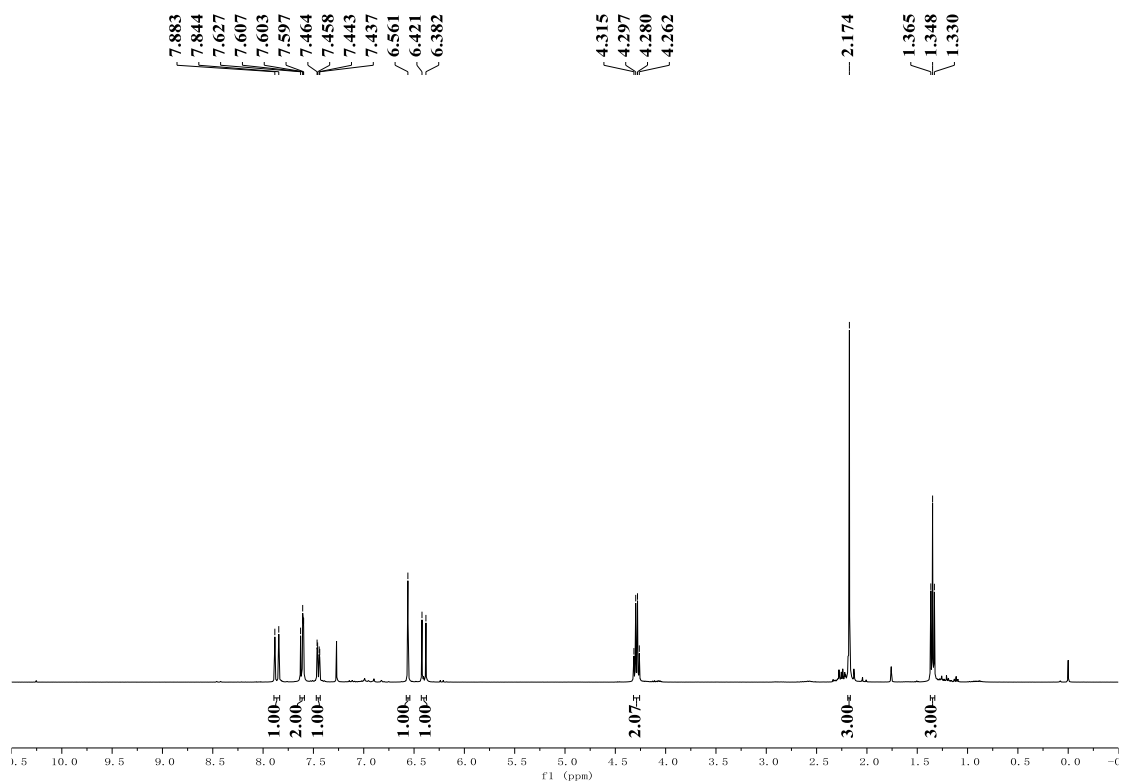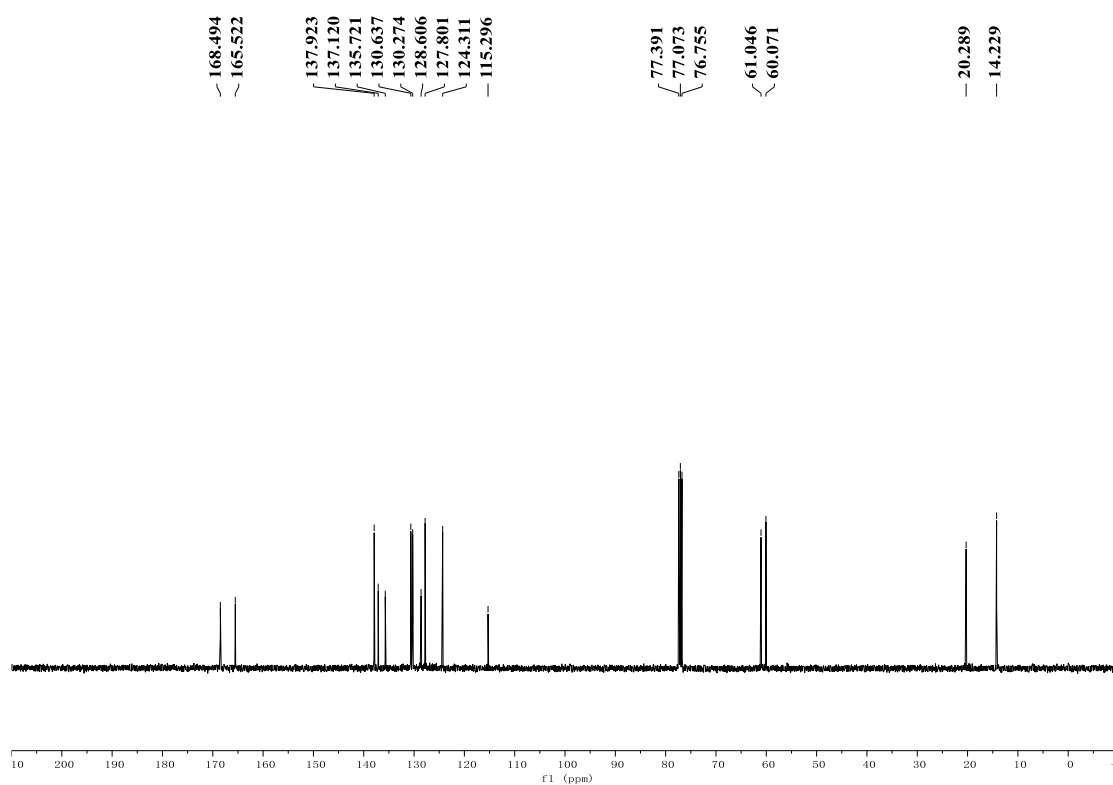

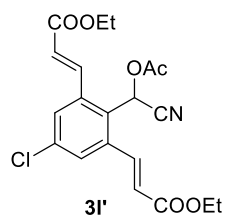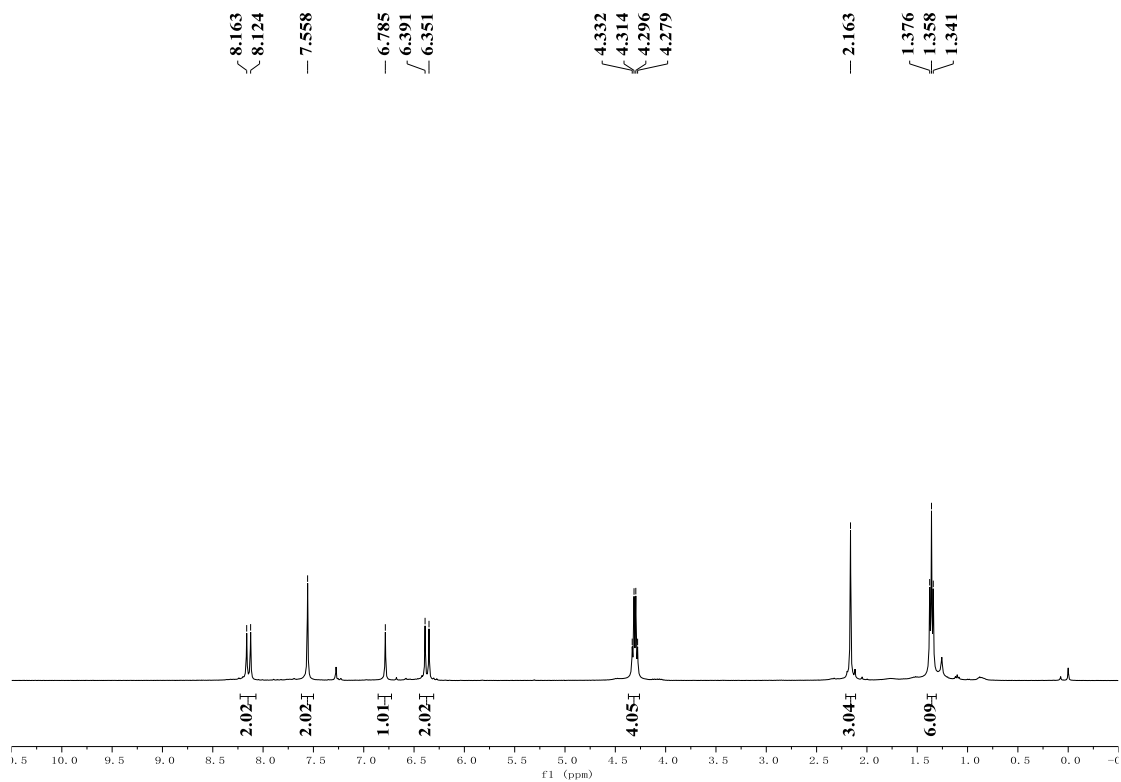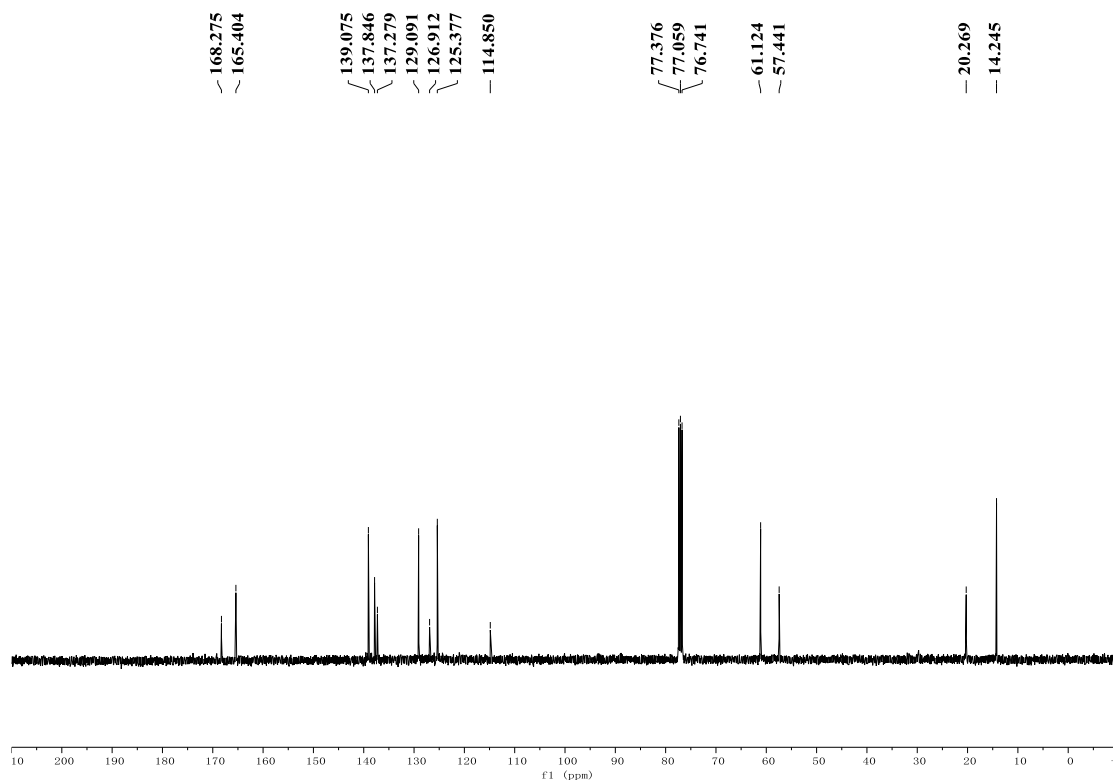



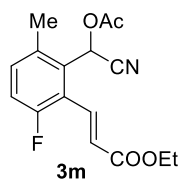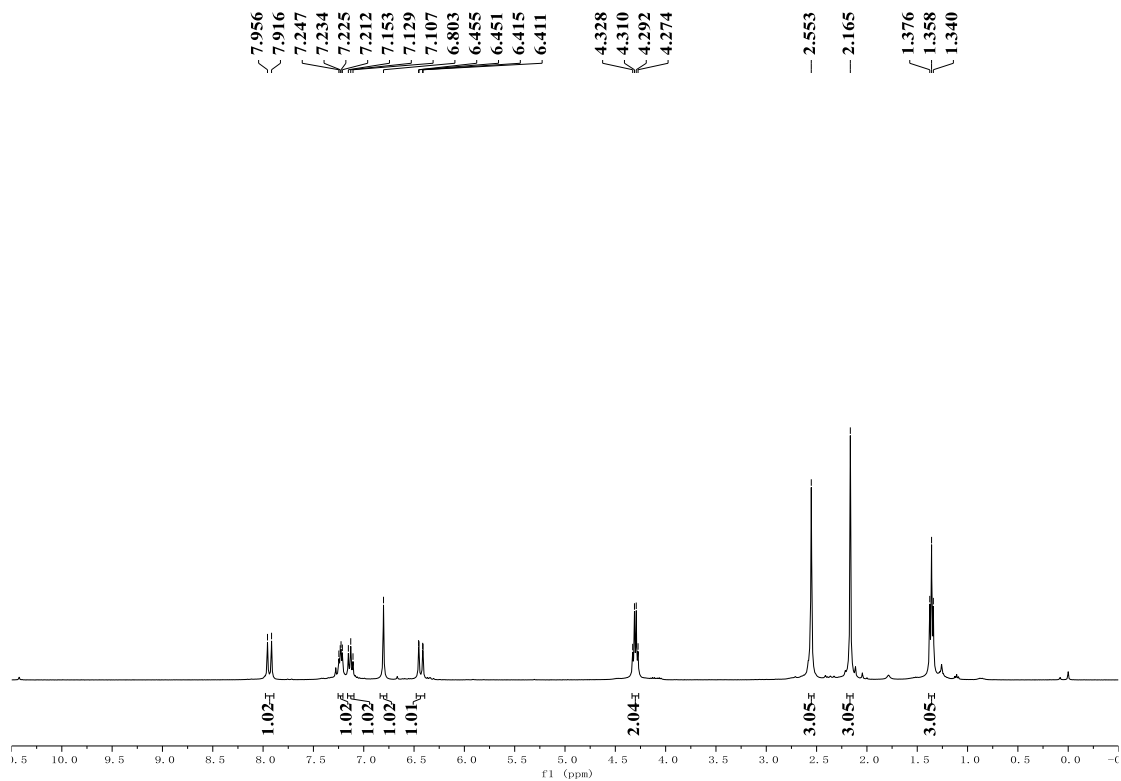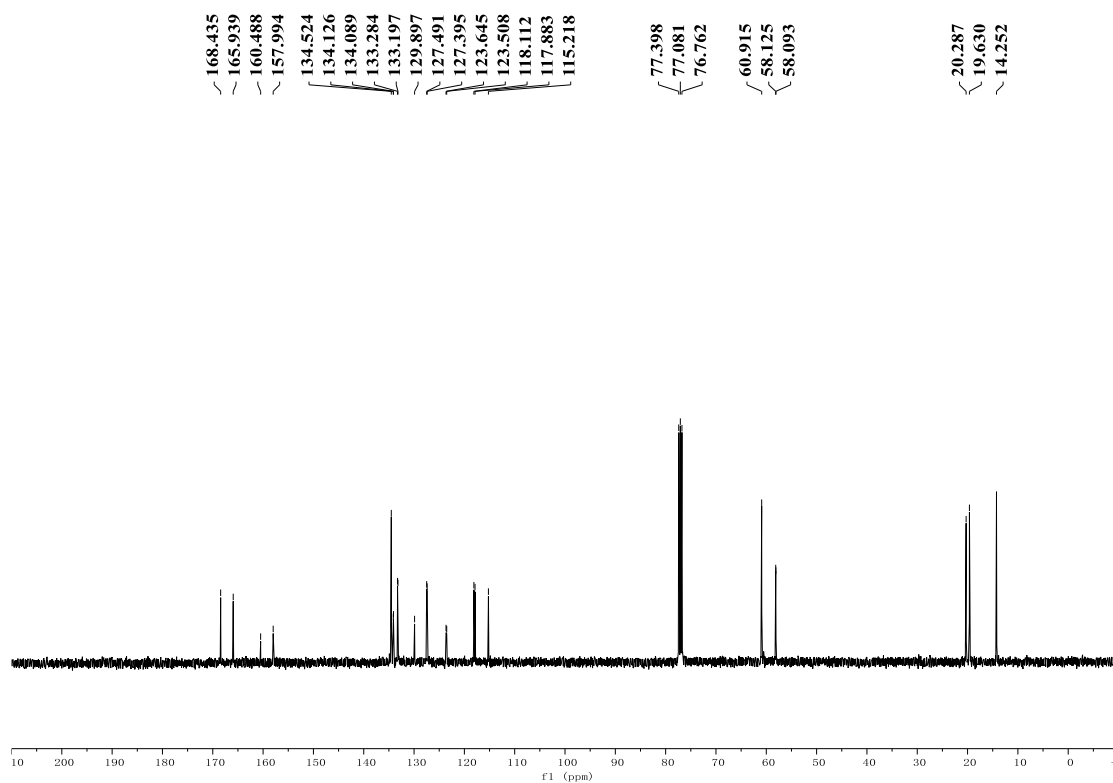

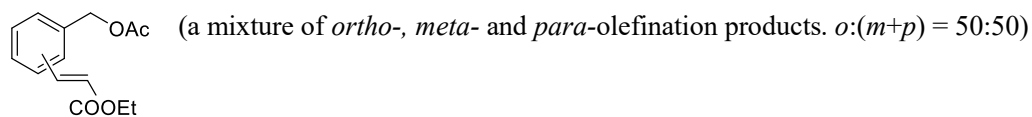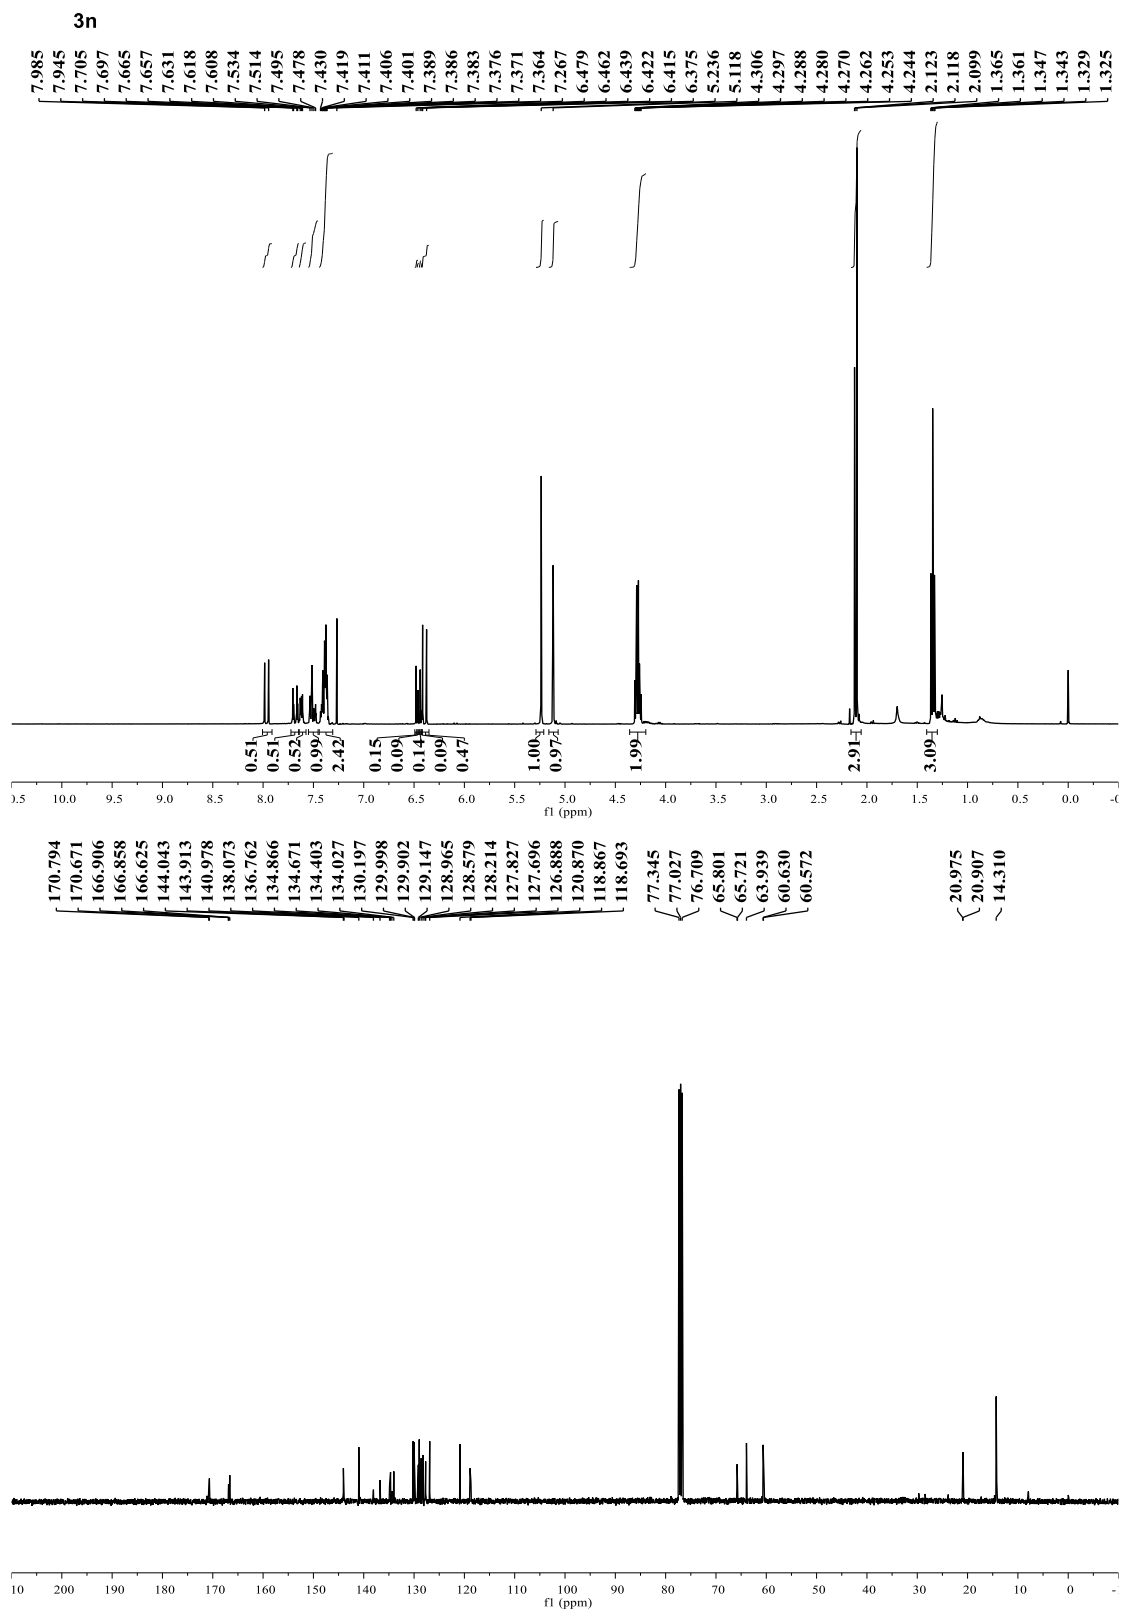

**3o** (a mixture of *ortho*-, *meta*- and *para*-olefination products. *o*:(*m*+*p*) = 40:60)

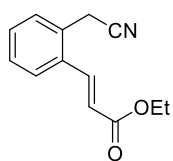

**ortho-olefinated product**

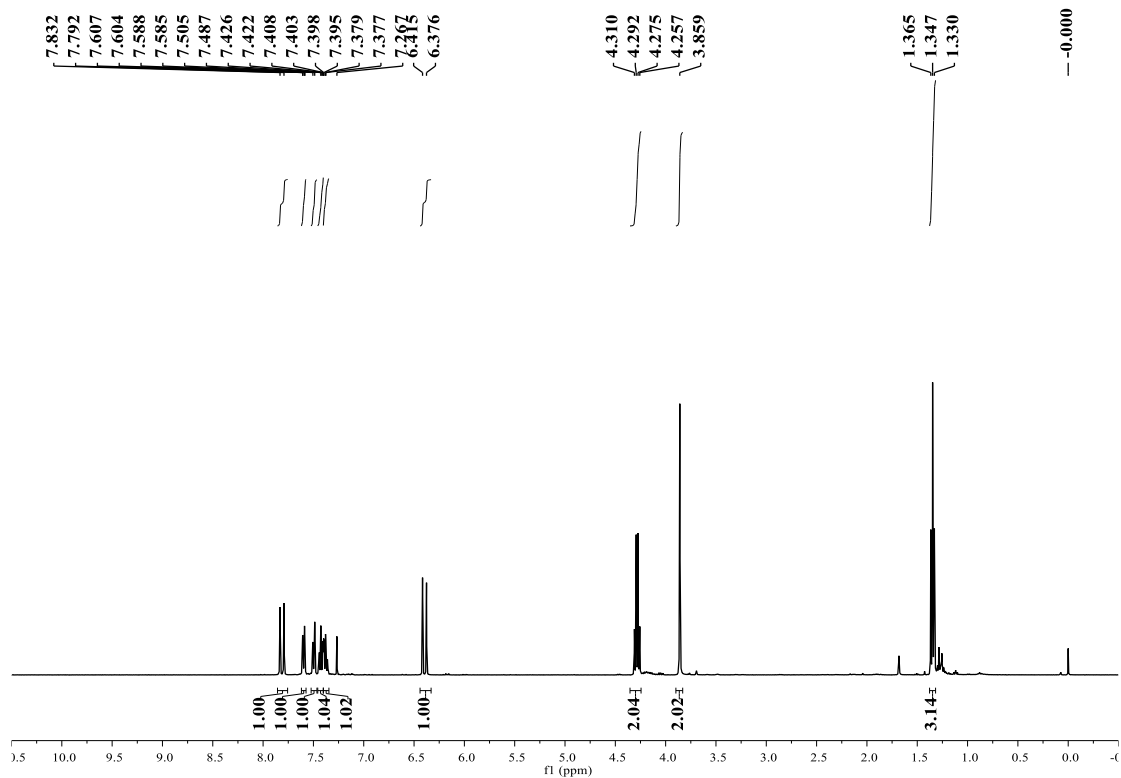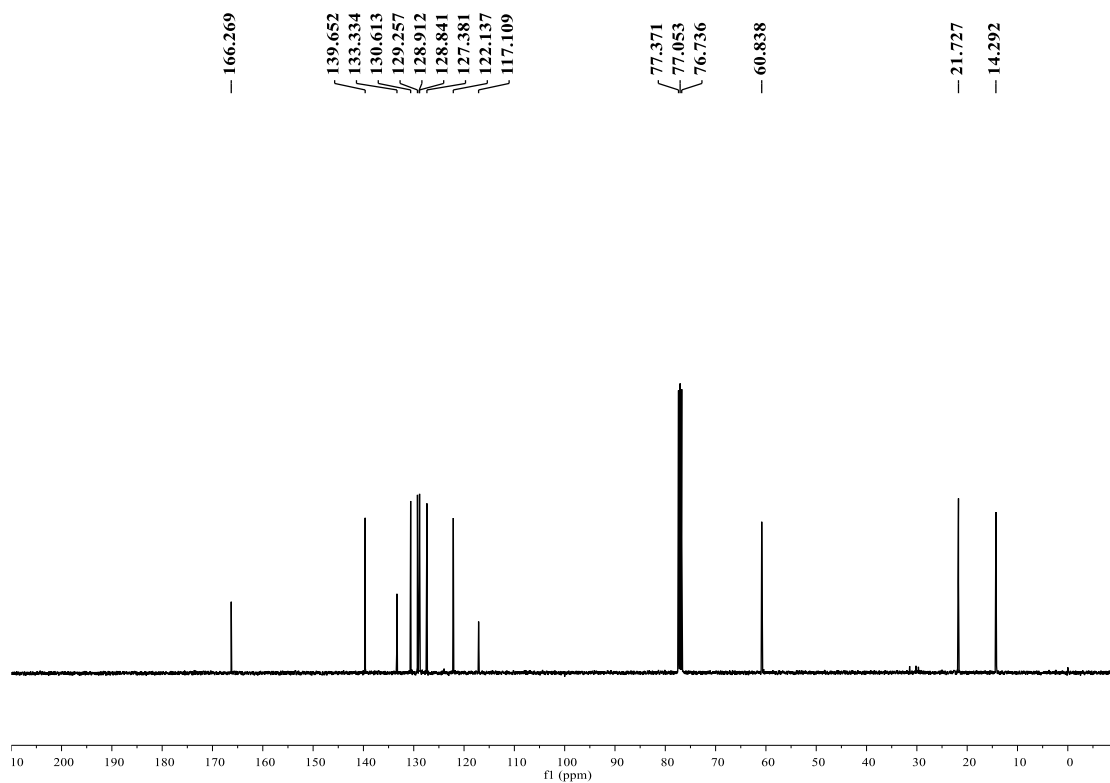

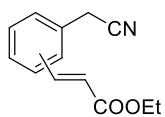

*meta-* and *para*-olefinated products

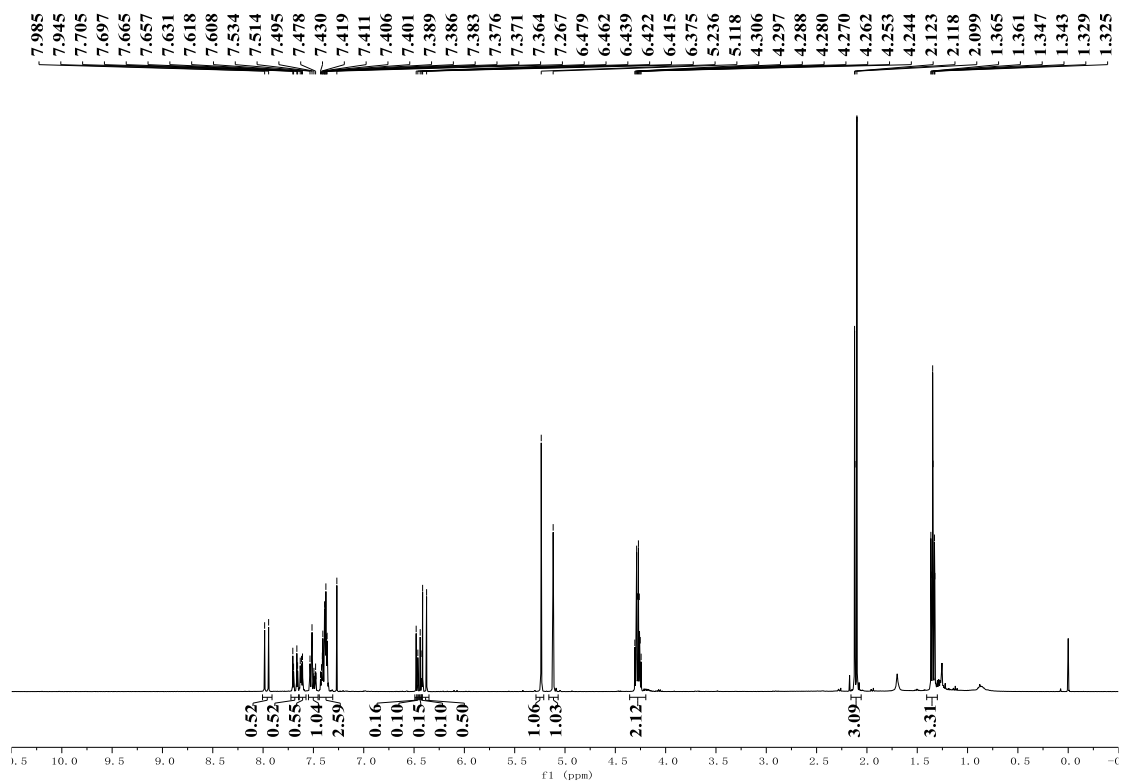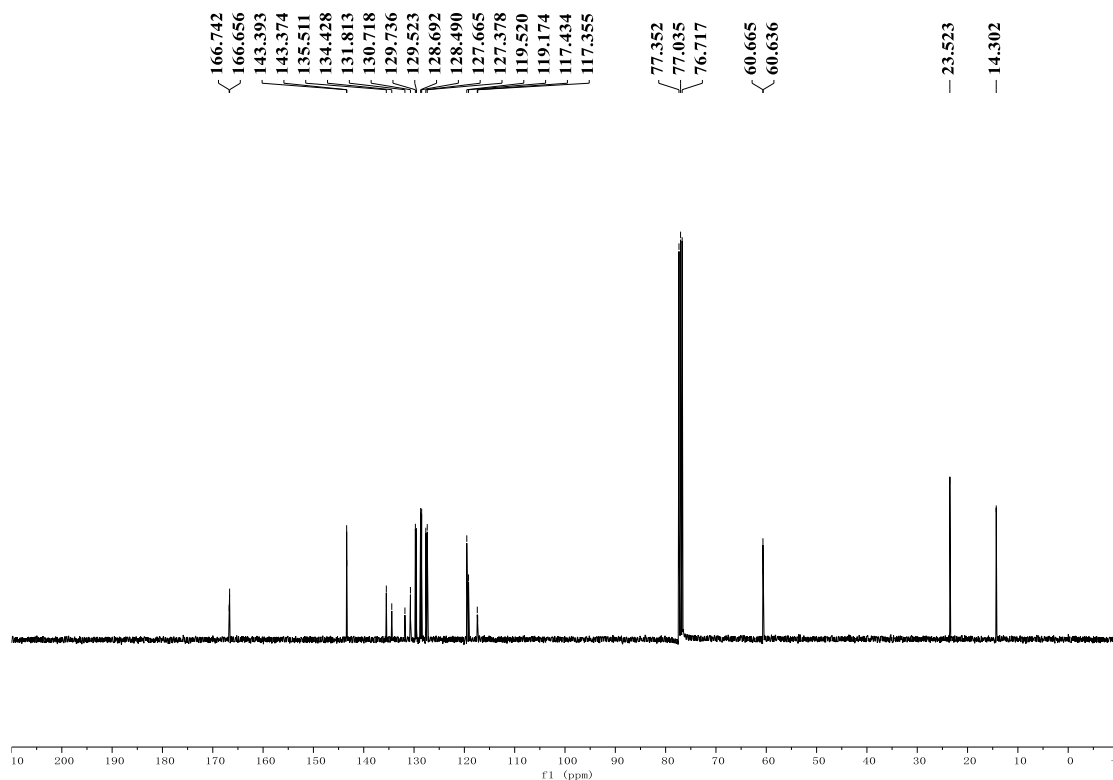

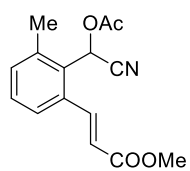

4a

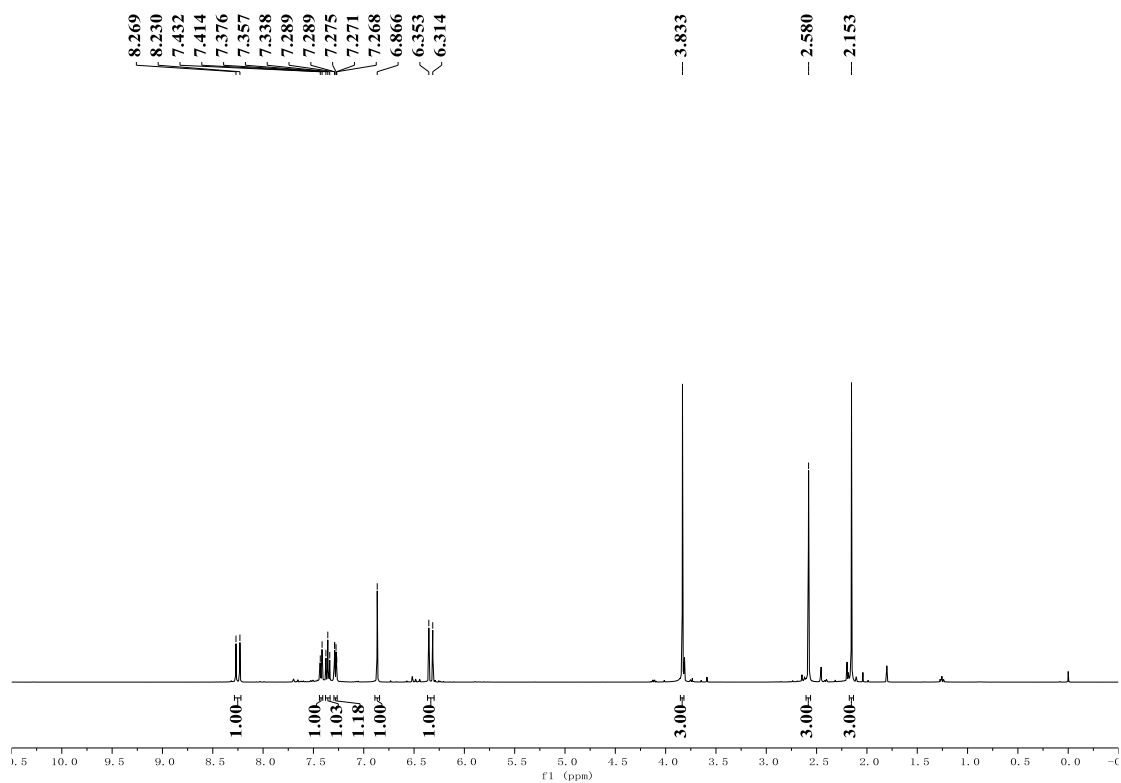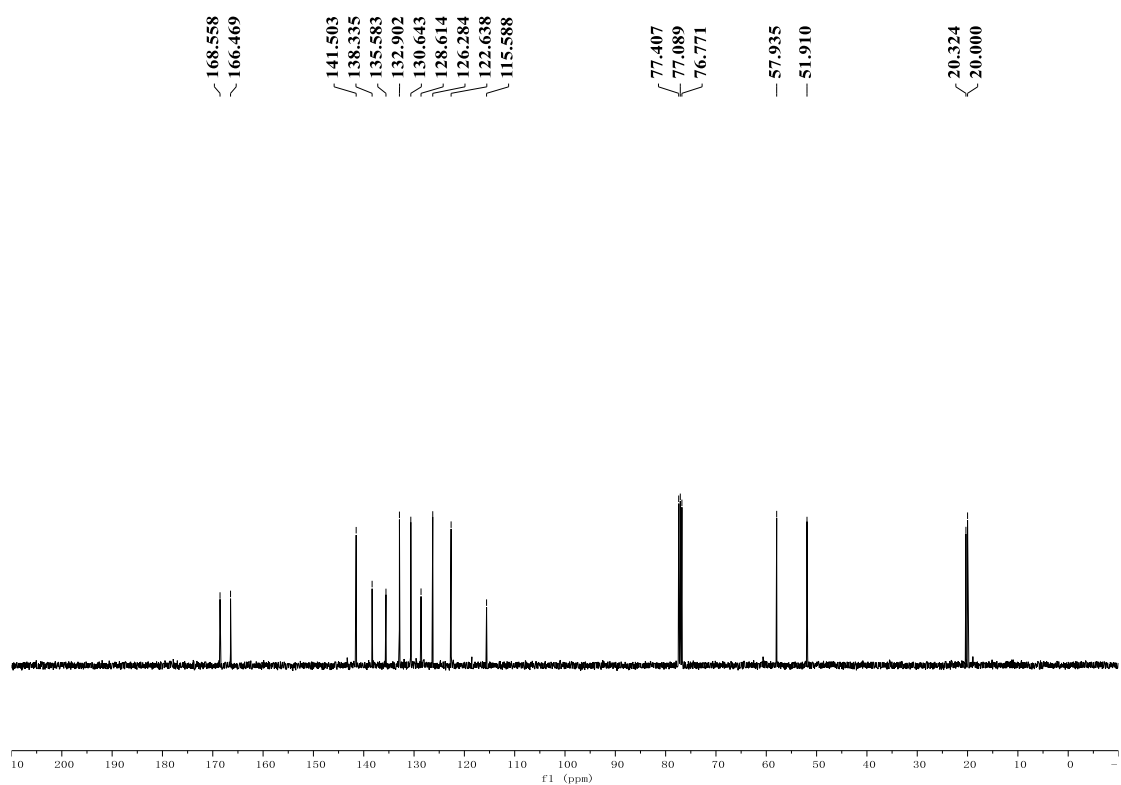

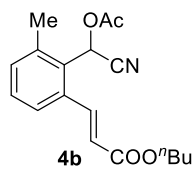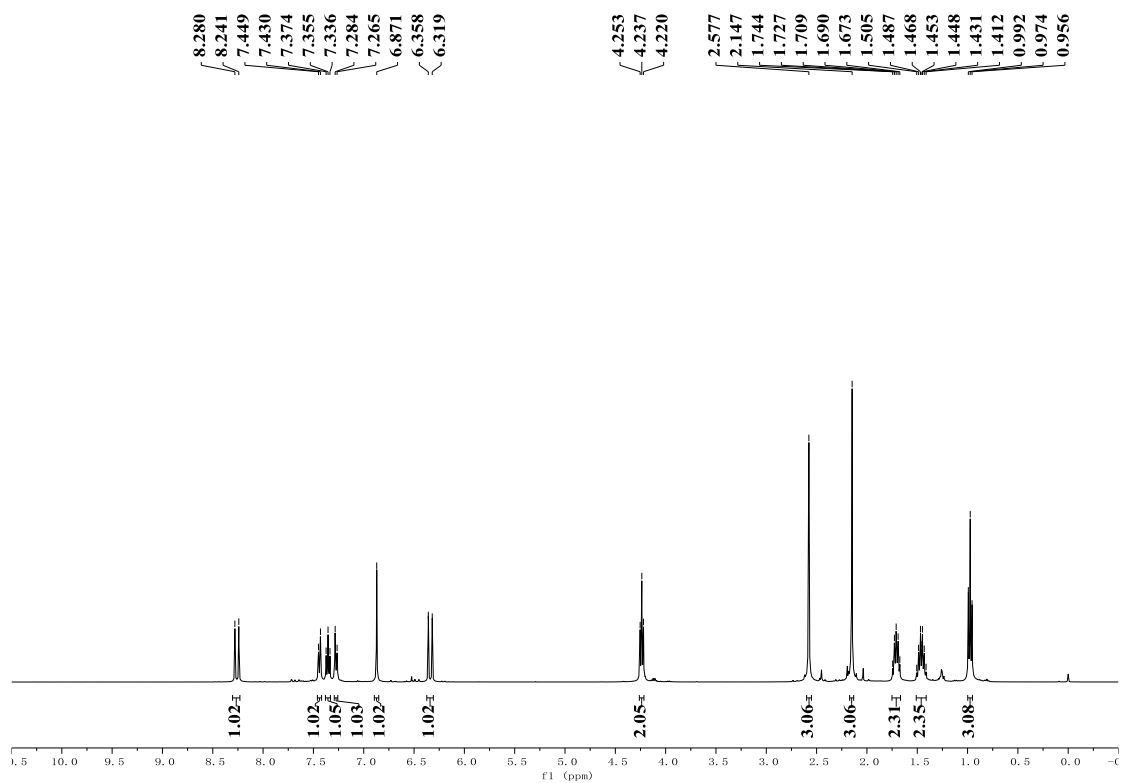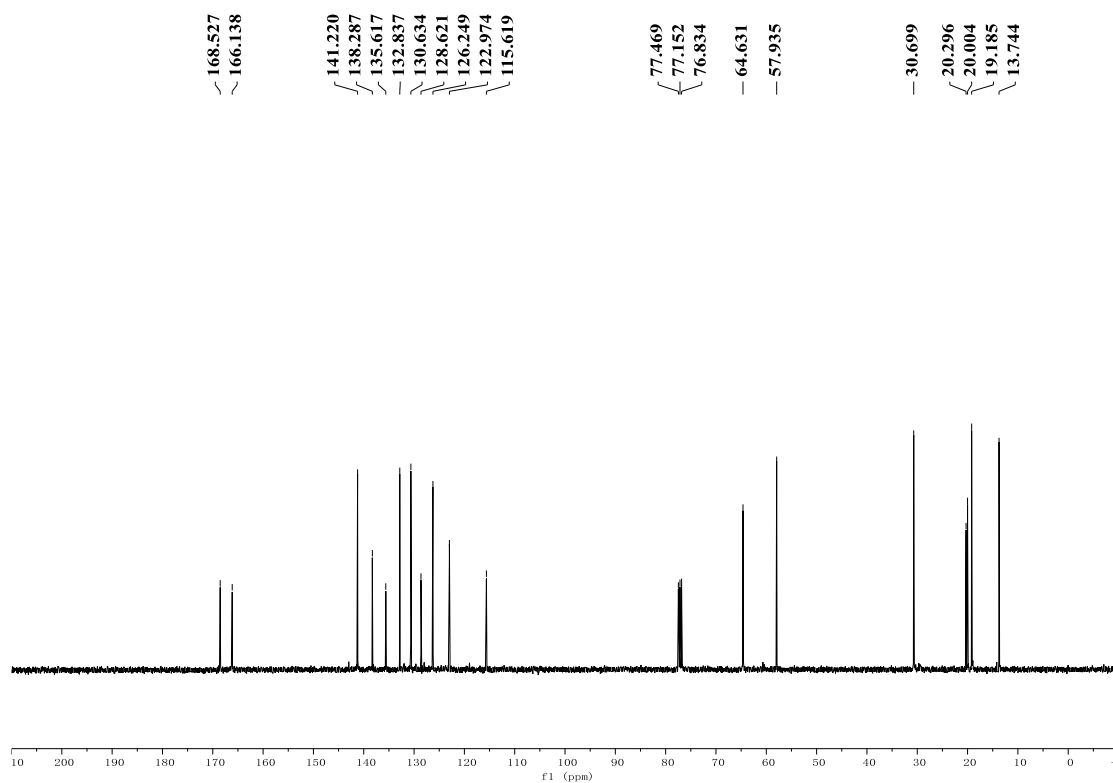

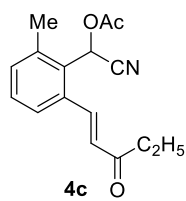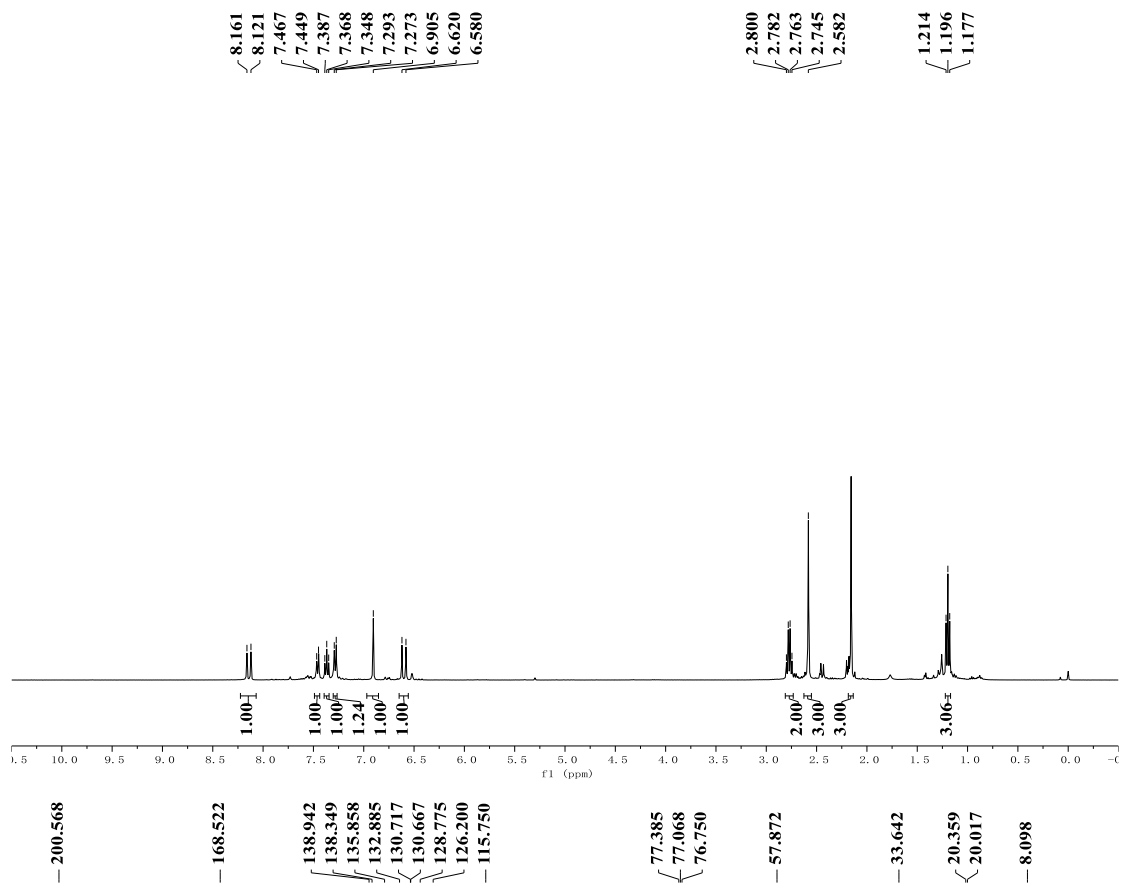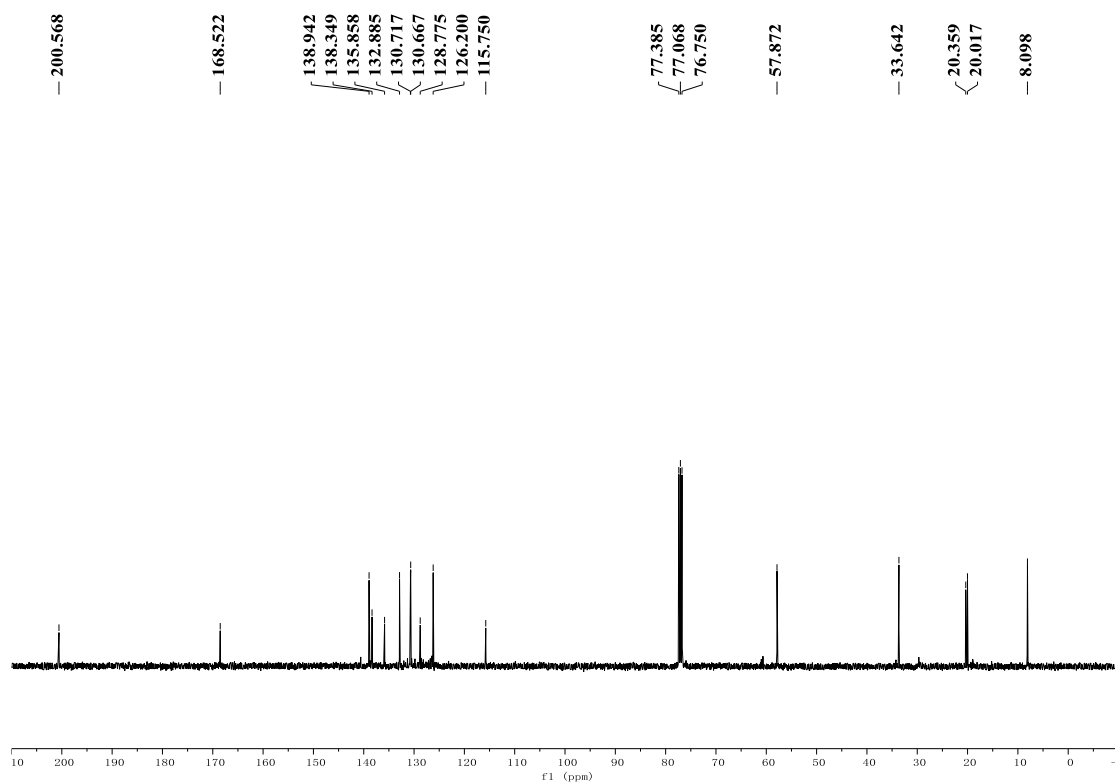

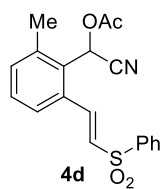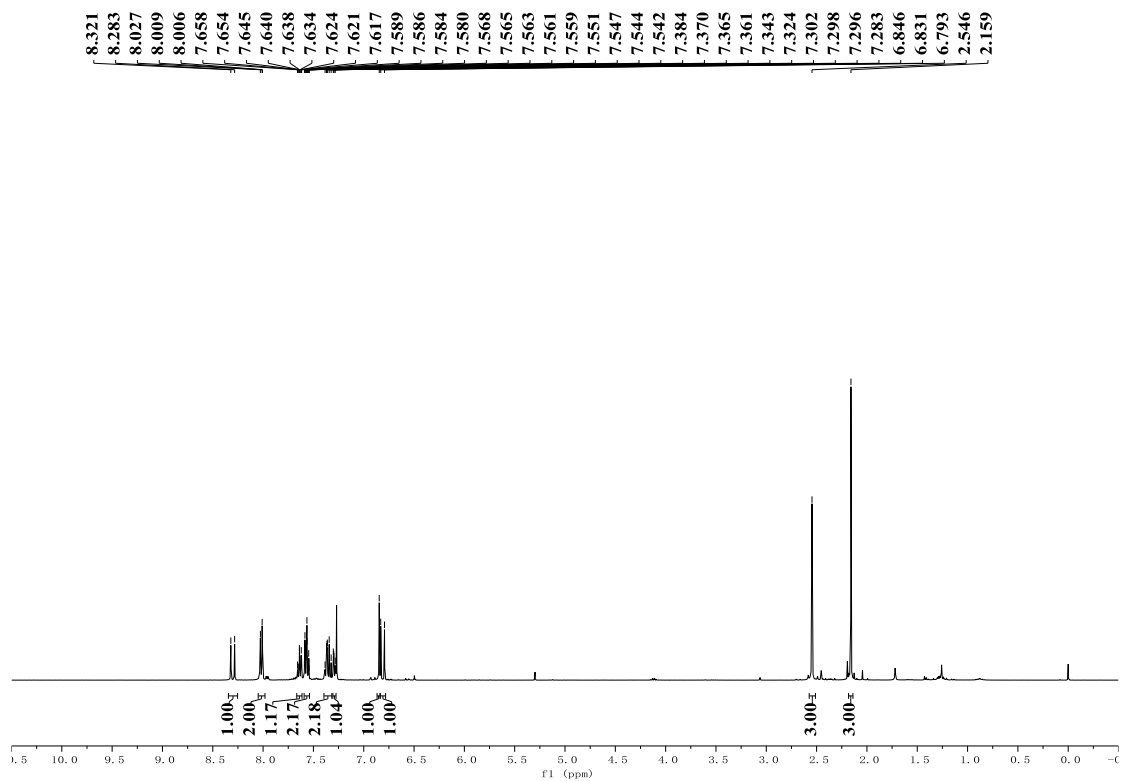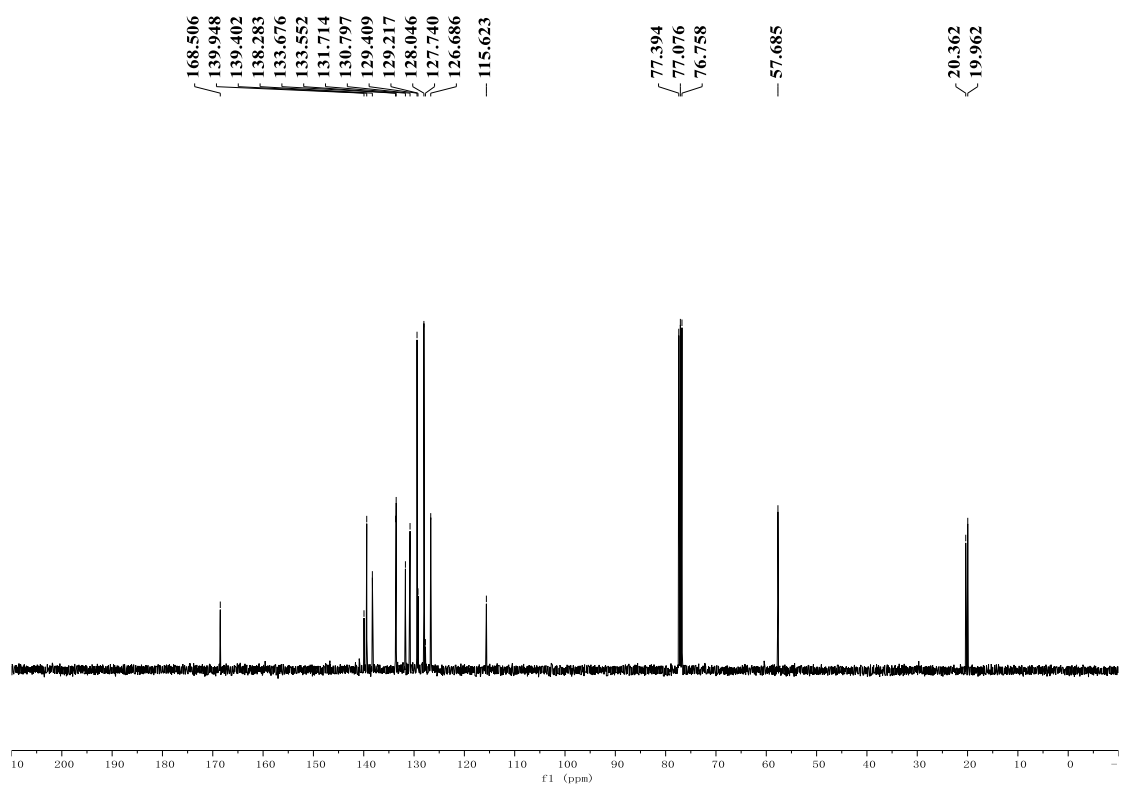



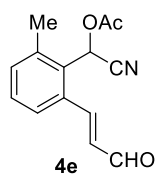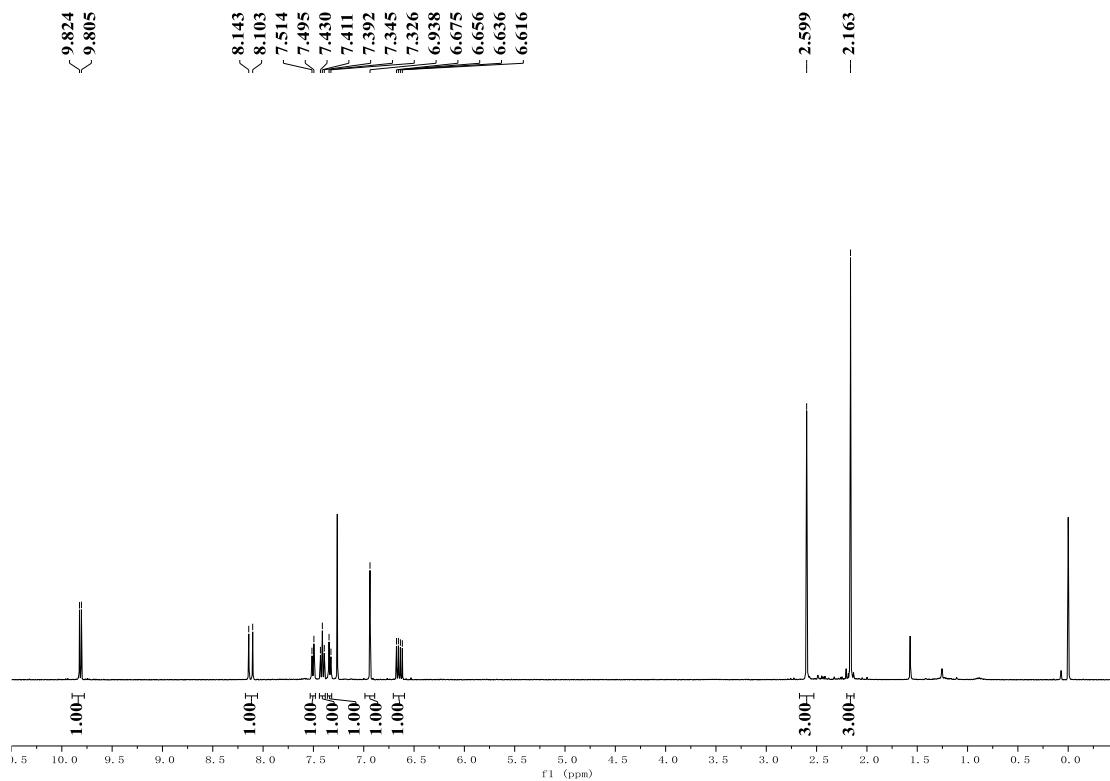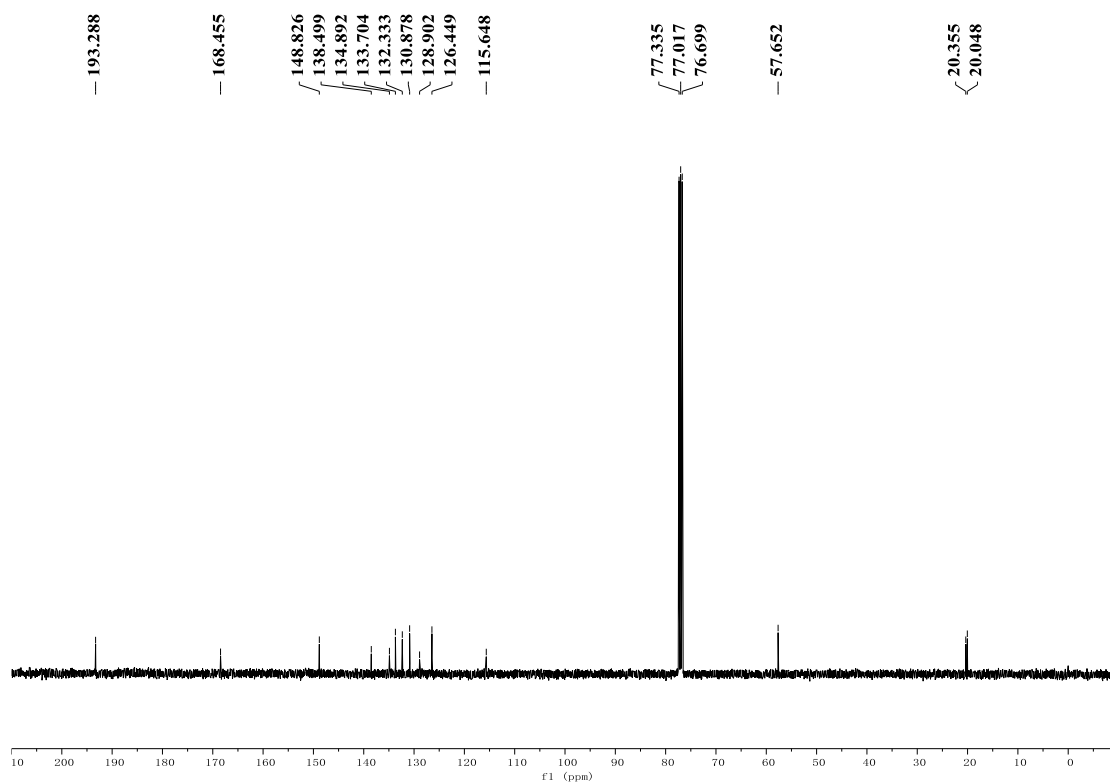

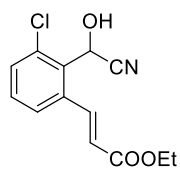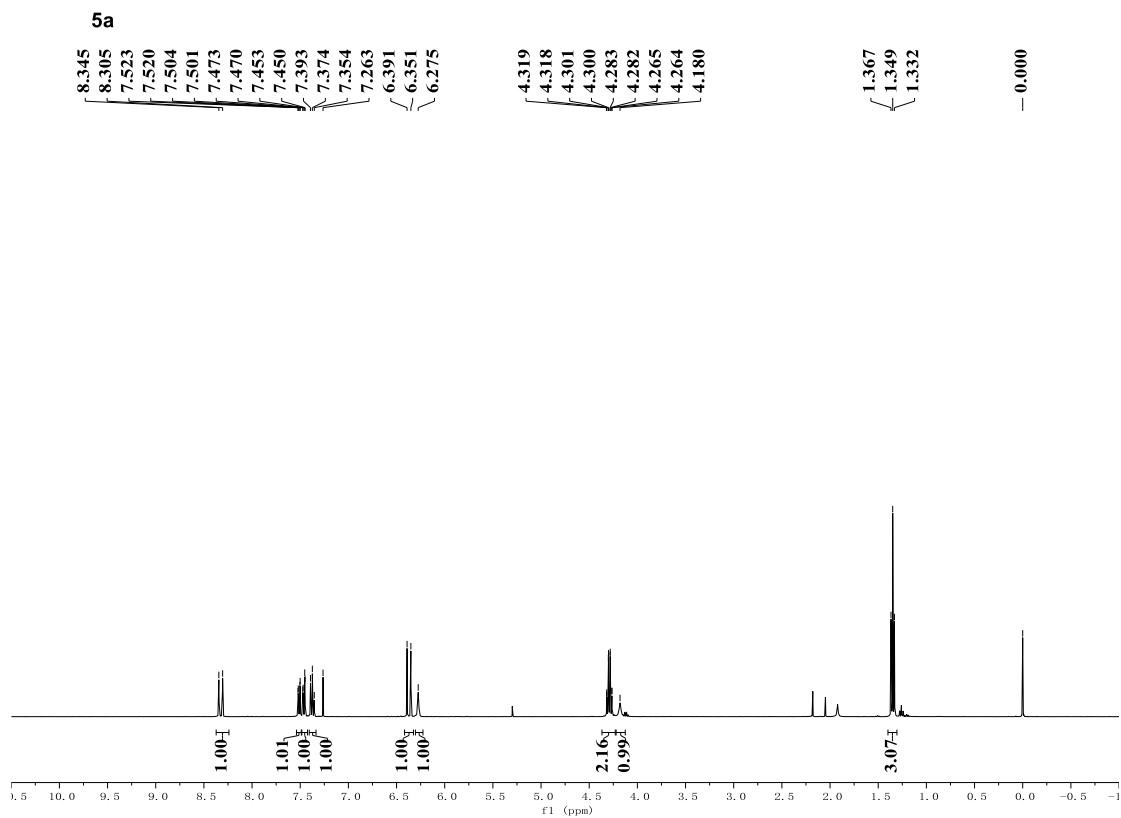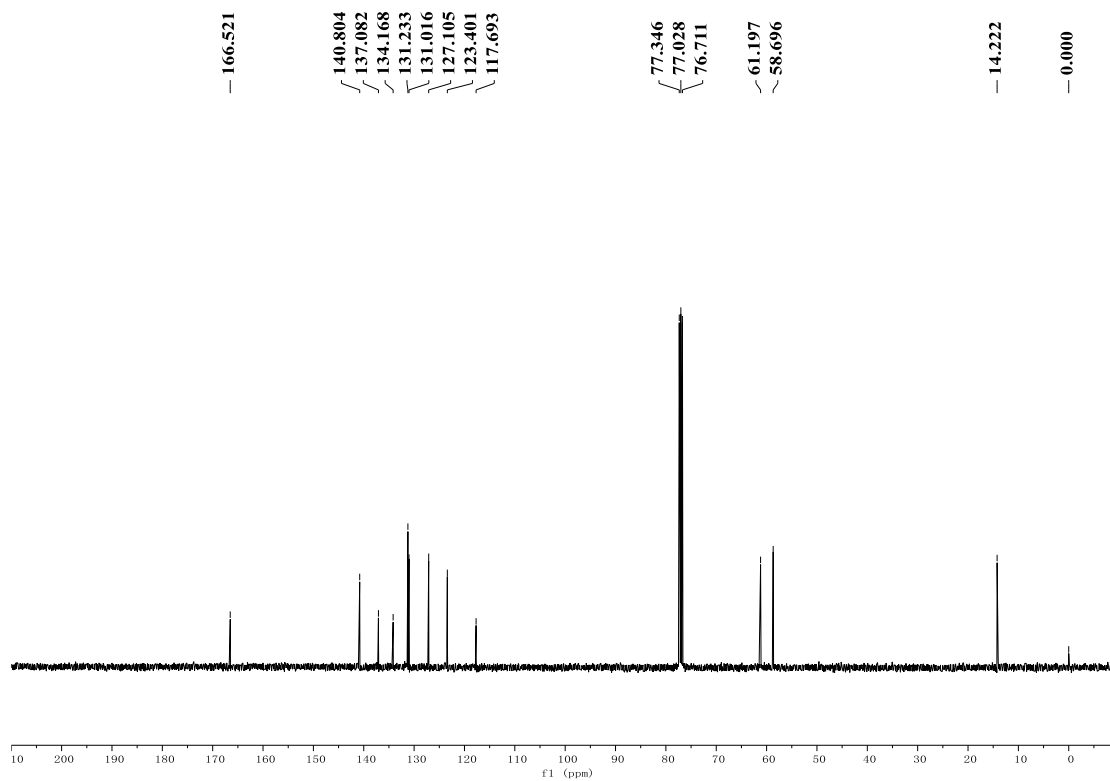

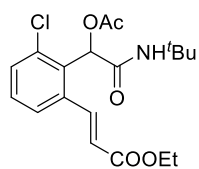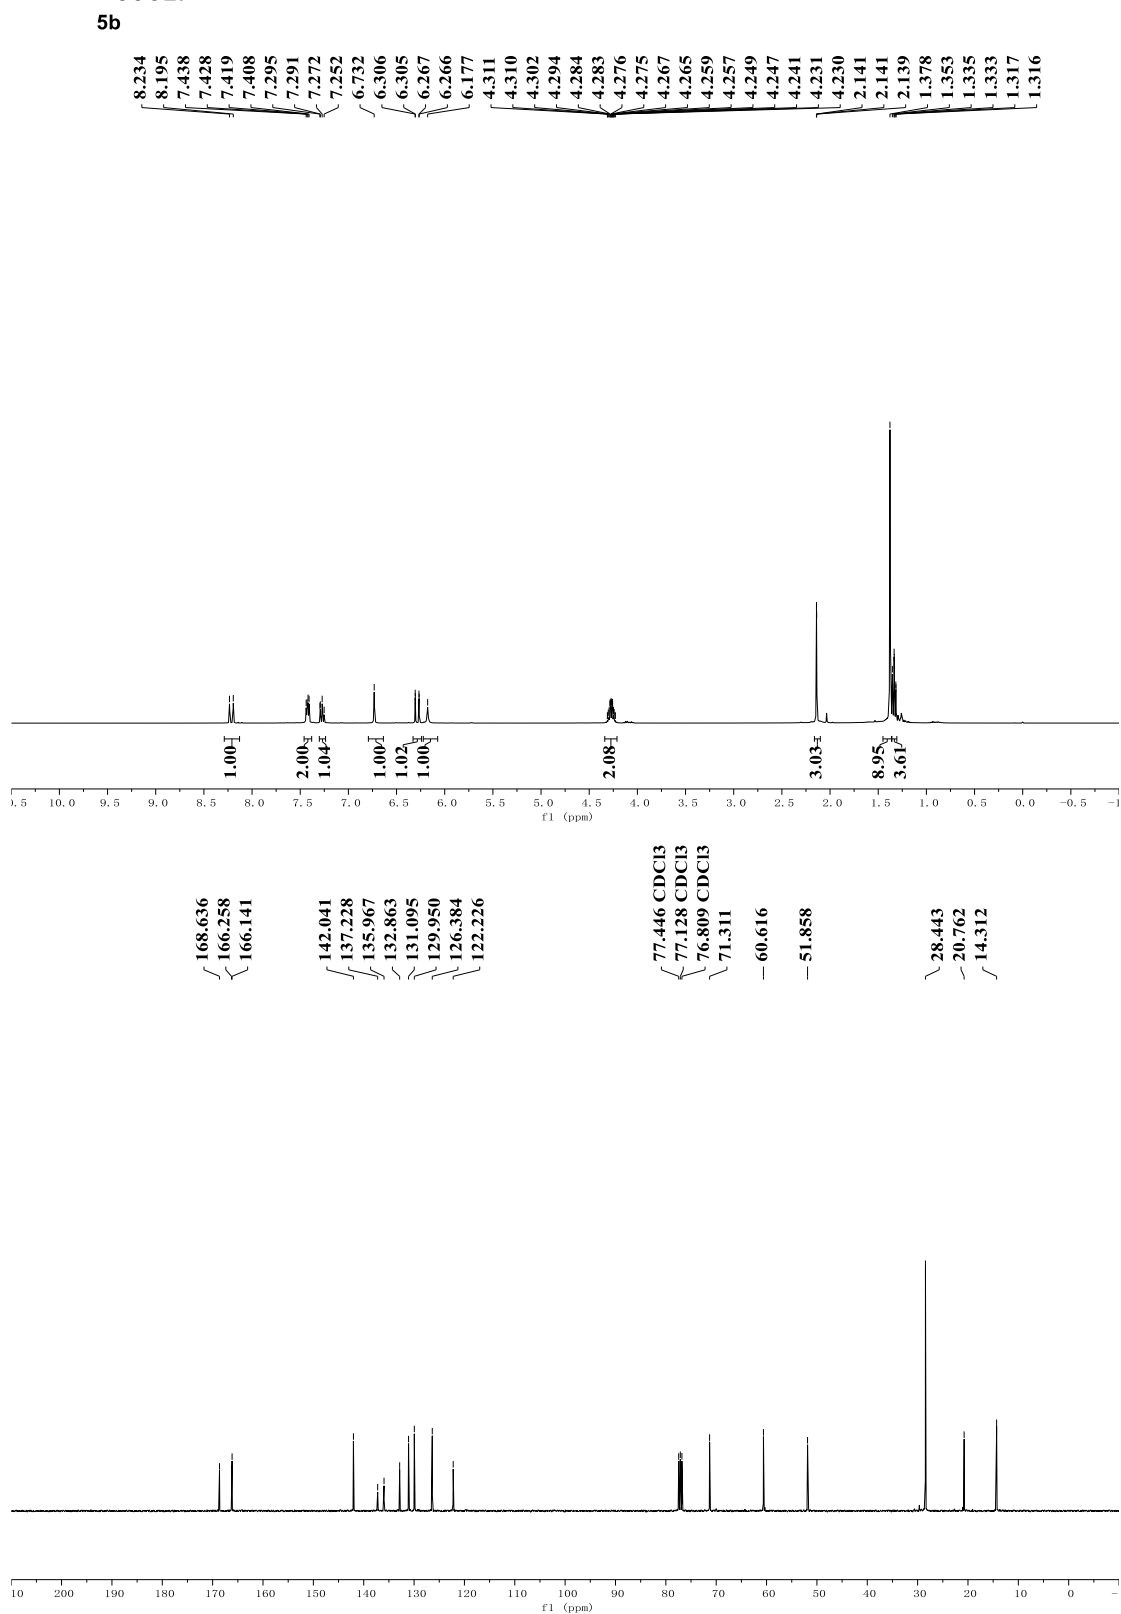

### 1D NOE of *ortho*-olefination product of **1n**

The ratio of **3n** was determined by 1D NOE of *ortho*-olefination product below and the  $^1\text{H}$  NMR peak shape of aromatic ring region:

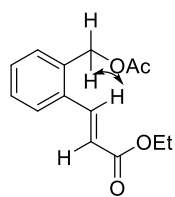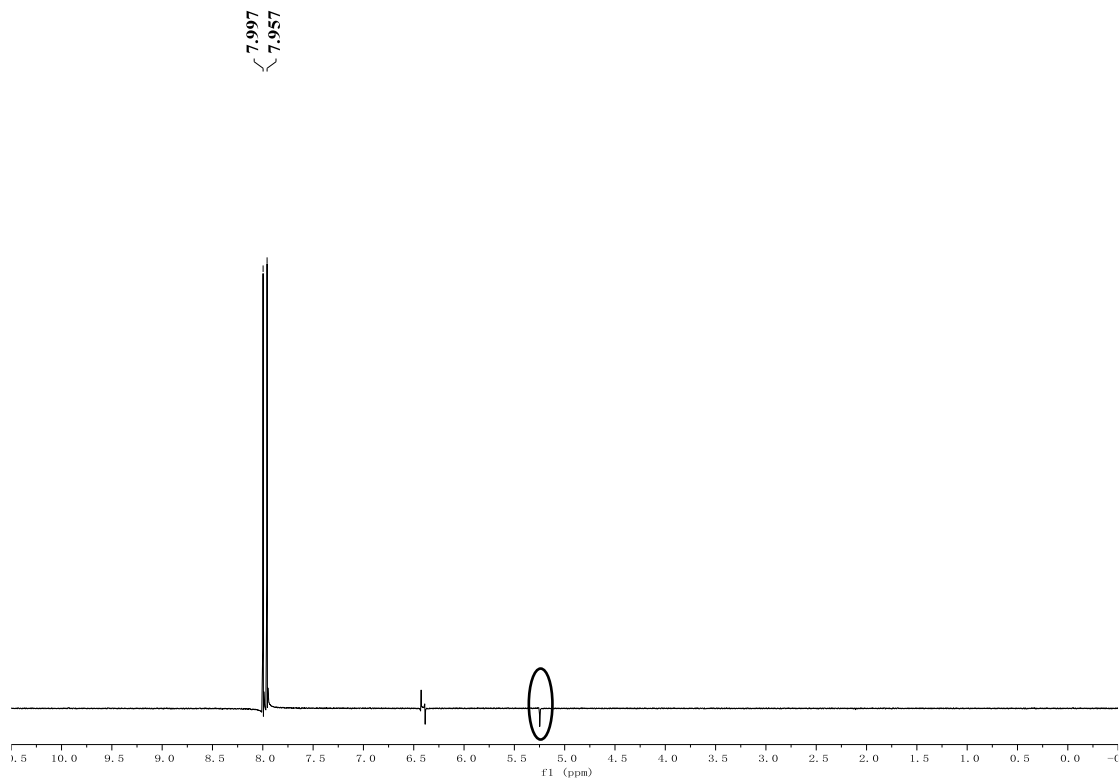

Supplement: Supplementary file 1 [file 12269087]
